1    **Title:**                    Inhibitory actions of melanin-concentrating hormone in the lateral septum  
2    **Running title:**        MCH-mediated LS inhibition  
3    **Authors:**                Mikayla A Payant, C Duncan Spencer, Melissa J Chee  
4    **Affiliation:**            Department of Neuroscience, Carleton University, Ottawa, ON, K1S 5B6,  
5                                Canada  
6    **Correspondence to:** Melissa Chee  
7                                HS 5309  
8                                1125 Colonel By Drive  
9                                Ottawa, ON, K1S 5B6  
10                                Canada  
11                                [melissa.chee@carleton.ca](mailto:melissa.chee@carleton.ca)  
12

13 **Key points**

- 14 • **RESEARCH QUESTION.** Melanin-concentrating hormone (MCH) neurons have dense  
15 nerve terminals within the lateral septum (LS), a key region underlying stress- and  
16 anxiety-like behaviours that are emerging roles of the MCH system, but it is not known if  
17 the LS is a MCH target site.
- 18 • **NEUROANATOMY.** We found spatial overlap between MCH-immunoreactive fibers,  
19 *Mchr1* mRNA, and MCHR1 protein expression especially along the lateral border of the  
20 LS.
- 21 • **ELECTROPHYSIOLOGY.** Within MCHR1-rich regions, MCH directly inhibited LS  
22 cells by increasing a chloride conductance in a protein kinase C-dependent manner.
- 23 • **SIGNIFICANCE.** Electrophysiological MCH effects in brain slices have been elusive  
24 and even fewer have described the mechanisms of MCH action. Our findings  
25 demonstrated, to our knowledge, the first description of MCHR1 Gq-coupling in brain  
26 slices, which was previously predicted in cell or primary culture models only. Together,  
27 these findings defined hotspots and mechanistic underpinnings for MCH effects such as  
28 in stress- and anxiety-related behaviours.

29

30 **Abstract**

31 Melanin-concentrating hormone (MCH) neurons can coexpress several neuropeptides or  
32 neurotransmitters and send widespread projections throughout the brain. Notably, there is a  
33 dense cluster of nerve terminals from MCH neurons in the lateral septum (LS) that innervate LS  
34 cells by glutamate release. The LS is also a key region integrating stress- and anxiety-like  
35 behaviours that are also emerging roles of MCH neurons. However, it is not known if the MCH  
36 peptide acts within the LS or whether MCH target sites are localized. We analysed the  
37 projections from MCH neurons in male and female mice anteroposteriorly throughout the LS and  
38 found spatial overlap between the distribution pattern of MCH-immunoreactive (MCH-ir) fibers  
39 with MCH receptor *Mchr1* mRNA hybridization or MCHR1-ir cells. This overlap was most  
40 prominent along the ventral and lateral border of the rostral part of the LS (LSr). Most MCHR1-  
41 labeled LS neurons laid adjacent to passing MCH-ir fibers, but some MCH-ir varicosities  
42 directly contacted the soma or cilium of MCHR1-labeled LS neurons. We thus performed whole-  
43 cell patch-clamp recordings from MCHR1-rich LSr regions to determine if and how LS cells  
44 respond to MCH. Bath application of MCH to acute brain slices activated a bicuculline-sensitive  
45 chloride current that directly hyperpolarized LS cells. This MCH-mediated hyperpolarization  
46 was blocked by calphostin C and suggested that the inhibitory actions of MCH were mediated by  
47 protein kinase C-dependent activation of GABA<sub>A</sub> receptors. Taken together, these findings  
48 defined potential hotspots within the LS that may elucidate the contributions of MCH to stress-  
49 or anxiety-related feeding behaviours.

## 50 **Introduction**

51           Neurons that produce melanin-concentrating hormone (MCH) are found primarily within  
52 the lateral hypothalamic area (LHA) (Broberger *et al.*, 1998; Broberger, 1999; Croizier *et al.*,  
53 2010; Beekly *et al.*, 2020), but they can send widespread projections throughout the brain  
54 (Skofitsch *et al.*, 1985; Bittencourt *et al.*, 1992). MCH neurons can express additional  
55 neuropeptides (Harthoorn *et al.*, 2005; Mickelsen *et al.*, 2017) and neurotransmitters like GABA  
56 (Jego *et al.*, 2013) and glutamate (Chee *et al.*, 2015). MCH has well-established functions in  
57 energy balance (Qu *et al.*, 1996; Shimada *et al.*, 1998; Ludwig *et al.*, 2001; Kokkotou *et al.*,  
58 2005; Pissios *et al.*, 2006) and sleep (Verret *et al.*, 2003; Ferreira *et al.*, 2017), but recent  
59 findings have also elaborated on the roles of MCH for regulating stress (Kim & Han, 2016),  
60 motivation (Mul *et al.*, 2011), and memory (Monzon *et al.*, 1999; Adamantidis *et al.*, 2005;  
61 Adamantidis and Lecea, 2009). The diverse functions of MCH thus implicate distinctive target  
62 sites for MCH.

63           MCH neurons strongly innervate the lateral septum (LS) via direct glutamatergic  
64 projections (Chee *et al.*, 2015), but it is not known whether MCH plays a role in the LS. MCH  
65 immunoreactivity has been detected in the LS of the rat brain (Skofitsch *et al.*, 1985; Bittencourt  
66 *et al.*, 1992), but this has not been examined in detail for the mouse brain. In rats,  
67 immunohistochemical staining showed that the LS comprises moderate levels of MCH-  
68 immunoreactive (MCH-ir) fibers within the LS, with the highest level of immunoreactivity in the  
69 ventral part of the LS (Bittencourt *et al.*, 1992). In addition to the presence of MCH-ir fibers, the  
70 expression of MCH receptors (MCHR) also aid in identifying the LS as a potential target site of  
71 MCH action. There are two known MCH receptors in the human brain, MCHR1 and MCHR2  
72 (Hill *et al.*, 2001), but only MCHR1 is present in the rodent brain (Tan *et al.*, 2002). Similar to

73 the widespread distribution of MCH-ir fibers, many brain regions can express *Mchr1* mRNA  
74 within the rat (Lembo *et al.*, 1999; Saito *et al.*, 2001) and mouse brain (Chee *et al.*, 2013).  
75 Indeed, there is a moderate level of *Mchr1* mRNA in both the rat (Lembo *et al.*, 1999; Saito *et*  
76 *al.*, 2001) and mouse LS (Chee *et al.*, 2013).

77 MCHR1 is a G-protein coupled receptor that can couple to G<sub>i</sub>- (Hawes *et al.*, 2000), G<sub>q</sub>-  
78 (Hawes *et al.*, 2000), or G<sub>s</sub>-protein-mediated pathways (Pissios *et al.*, 2003). However, MCH  
79 action in the brain is largely inhibitory by hyperpolarizing the membrane and suppressing action  
80 potential firing (Gao, 2009), for example at the lateral hypothalamus (Rao *et al.*, 2008), nucleus  
81 accumbens (Georgescu *et al.*, 2005; Sears *et al.*, 2010), or medial septal nucleus (Wu *et al.*,  
82 2009). In this study, we assessed the neuroanatomical and electrophysiological premise for MCH  
83 action in the LS and determined whether MCH could inhibit the activity of LS cells.

84 We described the distribution of MCH-ir fibers, *Mchr1* mRNA, and MCHR1 protein in  
85 the mouse LS, and we used these fiber and cell maps to guide patch-clamp recordings to identify  
86 putative sites and mechanisms of MCH action. As the MCH system (Mystkowski *et al.*, 2000;  
87 Mogi *et al.*, 2005; Rondini *et al.*, 2007; Takase *et al.*, 2014; Terrill *et al.*, 2020; Teixeira *et al.*,  
88 2020) as well as the LS has been shown to be sexually dimorphic, we completed our analyses in  
89 the male and female brain but determined that there were no sex differences in the  
90 neuroanatomical and electrophysiological effects of MCH. We observed similar distribution  
91 patterns between MCH-ir, *Mchr1* mRNA, and MCHR1 protein throughout the entire  
92 rostrocaudal extent of the LS and found that MCH directly inhibited LS cells by recruiting  
93 protein kinase C (PKC) and activating a GABA<sub>A</sub> receptor-mediated chloride conductance. These  
94 findings indicate that MCH can act in the LS to regulate neuron activity and suggest that the LS  
95 is an important projection site for MCH functions.

96

## 97 **Materials and Methods**

98           The use of all animals has been approved by the Carleton University Animal Care  
99 Committee on Animal Use Protocol 110940 in accordance with guidelines provided by the  
100 Canadian Council on Animal Care. All C57BL/6J wild type mice (stock 000664; Jackson  
101 Laboratory, Bar Harbor, ME) were bred in house and maintained on a 12-hour light-dark cycle  
102 (22–24°C; 40–60% humidity). All mice were given *ad libitum* access to food (Teklad Global  
103 Diets 2014, Envigo, Mississauga, Canada) and water.

## 104 **Neuroanatomy**

105           ***Tissue processing.*** Mice were anesthetized with an intraperitoneal injection (i.p.) of  
106 chloral hydrate (700 mg/kg; MilliporeSigma, Burlington, MA) prepared in sterile saline,  
107 transcardially perfused with cold (4°C) saline (0.9% NaCl), then followed by fixation with 10%  
108 formalin (VWR, Radnor, PA). The brain was extracted from the skull, post-fixed overnight in  
109 10% formalin (24 hr, 4°C), and cryoprotected in phosphate buffered saline (PBS) containing  
110 20% sucrose and 0.05% sodium azide (24 hr, 4°C). Mice whose brains were processed for  
111 MCHR1 immunohistochemistry were perfused with saline followed by 250 mL of 10% formalin.  
112 Brains were post-fixed in 20% sucrose dissolved in 10% formalin (4 hr, 4°C) then cryoprotected  
113 as above.

114           All brains were sliced into five series of 30 µm coronal sections using a freezing  
115 microtome (Spencer Lens Co., Buffalo, NY). Two tissue series remained free-floating in PBS-  
116 diluted formalin (comprising PBS-azide and formalin in a 9:1 ratio) prior to  
117 immunohistochemical staining for MCH or MCHR1. Three tissue series were mounted onto

118 Fisherbrand Superfrost Plus Microscope Slides (Fischer Scientific, Waltham, MA) to use for *in*  
119 *situ* hybridization. One series, designated as probe tissue, was used for *Mchr1* hybridization.  
120 Two adjacent series served as a positive control and a negative control to the probe tissue. The  
121 negative control tissue was later used for Nissl staining to parcellate and define the  
122 neuroanatomical boundaries of each slice. After tissues were mounted, the glass slides were air  
123 dried at room temperature (RT, 20–23°C; 1 hr), and then at –20°C (30 min) before being stored  
124 at –80°C.

125 ***Single-label immunohistochemistry.*** To detect MCH immunoreactivity, the tissue was  
126 washed in six 5-min exchanges of PBS and pretreated with 10 mM sodium citrate for 5 min  
127 (75°C) followed by 0.3% hydrogen peroxide in PBS for 20 min (RT). Following three 10-min  
128 PBS exchanges, the tissue was then blocked with 3% normal donkey serum (Jackson  
129 ImmunoResearch Laboratories, Inc., West Grove, PA) dissolved in PBS with 0.25% Triton-X  
130 (PBT) and 0.05% sodium azide for 2 hr (NDS; RT). After blocking, the tissue was incubated  
131 with an anti-rabbit MCH antibody (1:2,000; kindly provided by Dr. E. Maratos-Flier, Beth Israel  
132 Deaconess Medical Center; RRID: AB\_2314774; (Elias *et al.*, 1998; Chee *et al.*, 2013) overnight  
133 in NDS (RT). The following day, the tissue was washed six times in PBS (5 min each) then  
134 incubated with a biotinylated goat anti-rabbit antibody (1:500; Jackson ImmunoResearch  
135 Laboratories; RRID: AB\_2337965) prepared in NDS for 1 hr (RT). The tissue was washed three  
136 times in PBS for 10 min each and treated with avidin biotin horseradish peroxidase (PK-6100,  
137 Vector Laboratories, Newark, CA) in PBT for 30 min (RT). Tissue was washed in three 10-min  
138 PBS exchanges and underwent tyramine signal amplification by treating with PBT comprising  
139 0.005% hydrogen peroxide and 0.5% borate-buffered biotinylated (Sulfo-NHS-LC biotin; 21335,  
140 Thermo Fisher Scientific, Waltham, MA) tyramine (T90344, MilliporeSigma) for 20 min (RT).

141 Following three 10-min washes in PBS, the tissue was incubated with an Alexa Fluor 647-  
142 conjugated streptavidin antibody (1:500; Jackson ImmunoResearch Laboratories; RRID: AB\_  
143 2341101) and NeuroTrace 435/455 (1:50; N21479, Thermo Fisher Scientific) in NDS without  
144 sodium azide for 2 hr (RT). Slices were then mounted on SuperFrost Plus microscope slides and  
145 coverslipped with ProLong Diamond Antifade Mountant (Thermo Fisher Scientific).

146 ***Dual-label immunohistochemistry.*** To detect MCHR1 immunoreactivity, tissue was first  
147 washed in six 5-min PBS exchanges and pretreated with 0.3% hydrogen peroxide in PBS for 20  
148 min (RT). Following a set of three 10-min washes, the tissue was blocked in NDS for 2 hr (RT)  
149 and then incubated in anti-rabbit MCHR1 antibody (1:3,000; Thermo Fisher Scientific; RRID:  
150 AB\_2541682) prepared in NDS for 48 hr (4°C). The tissue was rinsed with six 5-min PBS  
151 exchanges and incubated with a biotinylated goat anti-rabbit antibody (1:5,000) in NDS without  
152 azide for 1 hr (RT). Following three 10-minute washes, the tissue was incubated in avidin biotin  
153 horseradish peroxidase in PBT for 30 min (RT). The tissue was washed three times (10 min each,  
154 RT) and underwent tyramine signal amplification. After washing the tissue three times with PBS  
155 (10 min each, RT), it was incubated with a Cy3-conjugated streptavidin antibody (1:200, RT;  
156 Jackson ImmunoResearch Laboratories; RRID: AB\_2337244).

157 The tissue was then washed three times with PBS (10 min each) and incubated with an  
158 anti-rabbit NeuN antibody (1:2,000; MilliporeSigma; RRID: AB\_2571567) in NDS overnight  
159 (RT). The following day, the tissue was washed in six 5-min PBS exchanges and incubated with  
160 a donkey anti-rabbit Alexa Fluor 488-conjugate (1:500; Thermo Fisher Scientific; RRID:  
161 AB\_2535792) and NeuroTrace 435/455 (1:50) in NDS without azide. Finally, the tissue was  
162 washed for 2 hr in PBS (RT) prior to mounting on SuperFrost Plus slides and coverslipped with  
163 ProLong Diamond Antifade Mountant. This MCHR1 antibody has been previously validated for



164 ciliary expression (Diniz et al., 2020) and we have determined that there is no MCHR1 staining  
165 in the LS of male or female MCHR1-knockout mice (data not shown).

166 ***Triple-label immunohistochemistry.*** To determine the proximity of MCHR1- and MCH-  
167 immunolabeling at NeuN-labeled cells, brain tissues were prepared using procedures for  
168 optimized MCHR1 labeling. Tissues were treated to label MCHR1 immunoreactivity, as  
169 described above, followed by tyramine signal amplification and treatment with an Alexa Fluor  
170 647-conjugated streptavidin antibody (1:200; Jackson ImmunoResearch Laboratories; RRID:  
171 AB\_2341101). After rinsing with three PBS exchanges (10 min each), they were immediately  
172 incubated anti-rabbit MCH (1:2,000; RRID: AB\_2314774) and anti-mouse NeuN (1:1,000;  
173 HB6429, Hello Bio, Princeton, NJ) in NDS overnight (RT). After the tissues were washed in six  
174 5-min PBS exchanges, they were incubated with an NDS cocktail comprising donkey anti-rabbit  
175 Alexa Fluor 568-conjugate (1:1,000; Thermo Fisher Scientific; RRID: AB\_2534017) and donkey  
176 anti-mouse Alexa Fluor 488-conjugate (1:500; Thermo Fisher Scientific; RRID: AB\_141607) for  
177 2 hr at RT, rinsed with PBS, then mounted onto SuperFrost Plus slides and coverslipped with  
178 ProLong Diamond Antifade Mountant.

179 ***In situ hybridization.*** We optimized *in situ* hybridization procedures using a RNAscope  
180 Multiplex Fluorescent Reagent Kit v2 (Advanced Cell Diagnostics (ACD), Newark, CA) and  
181 manufacturer instructions for fixed-frozen mouse brain tissue (Document 323100-USM, ACD).  
182 To promote tissue adherence, slides were removed from storage at  $-80^{\circ}\text{C}$ , baked at  $37^{\circ}\text{C}$  for 45  
183 min, dehydrated in an ethanol gradient (50%, 70%, 100%; 5 min each), and then air-dried for 15  
184 min (RT) immediately prior to the start of tissue treatments.

185 Tissue was rehydrated in PBS for 5 min (RT), pretreated with 5–8 drops of hydrogen  
186 peroxide (323110, ACD) for 10 min (RT), washed twice in distilled water for 1 min each, and

187 submerged in 100% ethanol for 15 min (RT) to promote tissue adherence. The slides were then  
188 placed inside a steamer (Oster, Boca Raton, FL) using a coplin jar filled with preheated distilled  
189 water for 10 s (99°C) before transferring into the Target Retrieval Reagent (322000, ACD) for 5  
190 min (99°C). Following two 15 s washes in distilled water (RT), the slides were dehydrated in  
191 100% ethanol for 3 min, and then washed in three PBS exchanges (1 min each). A hydrophobic  
192 barrier was then drawn around each slide with an ImmEdge pen (Vector Laboratories), and the  
193 slides were dried overnight (RT). The following day, the slides were washed twice in PBS for 2  
194 min and then placed in 10% formalin for 30 min (RT). Slides were then washed twice in PBS for  
195 2 min and the tissue was treated with 5–8 drops of Protease Plus (322331, ACD) and incubated  
196 in a HyBEZ oven (310010, ACD) at 40°C for 30 min. After protease treatment, the slides were  
197 washed with two exchanges of distilled water for 1 min each.

198 RNAscope probes for *Mm-Ppib* (313911, ACD), *Bacillus dapB* (320871, ACD), and  
199 *Mm-Mchr1* (317491, ACD) were designated for positive control, negative control, or  
200 experimental targeting, respectively, and were applied directly to the slides to cover the tissue.  
201 The tissue was hybridized for 2 hr at 40°C in the HyBEZ oven, then washed with three fresh  
202 exchanges (2 min each; RT) of 1× Wash Buffer (310091, ACD). The hybridization signal was  
203 amplified by alternating incubations in AMP-1 (40°C, 30 min; 323110, ACD), AMP-2 (40°C, 30  
204 min; 323110, ACD), and AMP-3 (40°C, 15 min; 323110, ACD) with two Wash Buffer washes  
205 (2 min each).

206 *Mchr1* hybridization was then labeled with Cyanine 3 (Cy3) by treating tissue with HRP-  
207 C1 (40°C, 15 min; 323110, ACD), washing the tissue twice in Wash Buffer for 2 min (RT), and  
208 incubating the tissue with TSA plus Cy3 (1:750; NEL44E001KT, PerkinElmer, Waltham, MA)  
209 in TSA Buffer (322809, ACD) for 30 min in the 40°C oven. Slides were then washed twice in

210 Wash Buffer (2 min each, RT) and incubated with HRP Blocker (323110, ACD) in the oven at  
211 40°C for 15 min.

212 Where applicable, the tissue underwent immunohistochemical staining to label MCH-  
213 immunoreactive fibers, as adapted from Mickelsen and colleagues (2019). The tissue was  
214 blocked with NDS without sodium azide and applied to each slide for 30 min (RT). After  
215 blocking, the tissue was incubated with an anti-rabbit MCH antibody (1:2,000; RRID:  
216 AB\_2314774) for 1 hr (RT). The tissue was thoroughly rinsed with two exchanges in PBS (2  
217 min each) then incubated with a donkey anti-rabbit Alexa Fluor 647 conjugate (1:500;  
218 ThermoFisher Scientific; RRID: AB\_2536183) for 30 min (RT).

219 After washing the slides twice in Wash Buffer for 2 min (RT), 4–6 drops of 4',6-diamidino-2-  
220 phenylindole (DAPI; 323110, ACD) were applied for 30 s, and the slides were coverslipped  
221 using ProLong Diamond Antifade Mountant. Slides were dried in the dark overnight at RT and  
222 then stored at –20°C.

## 223 **Microscopy**

224 All images were acquired using a Nikon Ti2-E inverted microscope (Nikon Instruments  
225 Inc., Mississauga, Canada) and processed using NIS-Elements Imaging Software (Nikon).

226 **Confocal imaging.** Tiled confocal images were acquired with a Nikon C2 confocal  
227 system using 405-nm, 488-nm, 561-nm, and 640-nm excitation lasers to visualize DAPI or  
228 NeuroTrace, Alexa Fluor 488, Cy3, and Alexa Fluor 647 fluorophores, respectively. Full brain  
229 overview images of DAPI-labeled nuclei from *Mchr1* stained slices were acquired using a 4×  
230 objective (0.20 numerical aperture). Higher magnification images of the LS used for analysis  
231 were imaged for DAPI/NeuroTrace, Alexa Fluor 488, Cy3, and/or Alexa Fluor 647 signals with

232 a Plan Apochromat 10× objective (0.45 numerical aperture) or 20× objective (0.75 numerical  
233 aperture) at a single image plane and stitched with NIS-Elements Imaging Software. Where  
234 applicable, Z-stacks of 1 µm optical slices were acquired with a Plan Apochromat 40× objective  
235 (0.95 numerical aperture) or 60× objective (1.40 numerical aperture) and displayed as orthogonal  
236 XY, XZ, and YZ projections or projected by their maximum intensity values (NIS-Elements  
237 Imaging Software).

238 ***In situ hybridization signals.*** The negative control slices were imaged at a single image  
239 plane using the Plan Apochromat 10× objective and the 561-nm laser. The positive control *Ppib*  
240 hybridization signals were imaged to assess tissue and RNA quality. Images of all the sections  
241 containing the LS for both negative control and experimental probe series were acquired using  
242 the same settings to ensure that any differences observed between sections were not due to a  
243 difference in magnification, scan area, laser power, or gain. Tiled images of the LS from each  
244 probe section were then acquired at 10× magnification using the 405-nm, and 561-nm lasers to  
245 image DAPI- and *Mchr1*-labeling. Images were saved and exported such that the different  
246 channels could be toggled on and off to allow visualization of individual channels.

247 ***Brightfield imaging.*** Large field-of-view images of Nissl-stained tissue were viewed and  
248 imaged using a CF160 Plan Apochromat 10× objective lens and acquired with a DS-Ri2 colour  
249 camera (Nikon). Shading correction was applied during image acquisition to adjust for  
250 illumination inconsistencies at the edge of each image tile. The tiled images were stitched with  
251 NIS-Elements Imaging Software.

252 **Image analysis**

253           ***Plane-of-section analysis.*** To assess the neuroanatomical distribution of MCH-ir fibers  
254 and MCHR1 protein, we used unique cytoarchitectural features seen in tiled, confocal  
255 photomicrographs of NeuroTrace-staining to parcellate and draw boundaries corresponding to  
256 brain regions defined in the *Allen Reference Atlas* (ARA; Dong, 2008) (Supporting Figure 1Ai,  
257 Ci).

258           We used tiled, brightfield photomicrographs of Nissl-staining to parcellate tissue used to  
259 analyse *Mchr1* hybridization signals (Supporting Figure 1Bi). Following confocal imaging,  
260 coverslipped tissue that served as the negative control was soaked in PBS overnight (RT) until  
261 the coverslip slid off. The exposed brain tissue was then treated for Nissl staining, as previously  
262 described (Negishi *et al.*, 2020; Bono *et al.*, 2022). Where necessary, DAPI-labeled overview  
263 images were aligned with parcellated images of the Nissl-stained tissue. Confocal images of  
264 *Mchr1* mRNA hybridization signal in the LS were imported into Adobe Illustrator 2021 (Adobe  
265 Inc., San Jose, CA) and aligned to DAPI-labeled overview images. White matter, ventricles,  
266 blood vessels, and other easily identifiable landmarks were used to ensure slices were properly  
267 aligned.

268           All parcellations were drawn in Illustrator using an Intuos graphic tablet (Wacom, Kazo,  
269 Japan) with reference to nomenclature and atlas levels provided by the ARA.

270           ***Fiber density.*** Confocal images of MCH immunoreactivity in the LS were visualized by  
271 Alexa Fluor 647 emission. MCH-ir axon fibers and varicosities were traced in a new layer within  
272 Illustrator using an Intuos graphic tablet (Supportingfigure 1Aii). Fiber tracing was restricted to  
273 the LS only and then mapped to ARA brain templates (see *Mapping* description below). For each  
274 atlas level, another layer was added to the Illustrator file so that a filled shape can be drawn to  
275 encompass each LS subregion and the entire LS area. A clipping mask of this filled shape was

276 then applied to isolate, as separate image files, the filled shape of the total LS area, filled shape  
277 of each subregion, mapped fiber tracing in the full LS, and mapped fiber tracing in each  
278 subregion. The images were then analysed in MATLAB (MathWorks, Natick, MA) to determine  
279 the total number of pixels encompassing the subregions or entire LS area ( $pixels_{total}$ ) and the  
280 number of pixels occupied by the fiber tracings ( $pixels_{fibers}$ ). As the LS is a heterogenous three-  
281 dimensional structure, we analysed fiber density at all LS levels (Risold and Swanson, 1997a;  
282 Risold and Swanson, 1997b). The density of MCH-ir fibers at each ARA level ( $D$ ) was expressed  
283 on a ratio scale as:  $D = 100 (pixels_{fibers}/pixels_{total})$  to capture nuanced changes in fiber density  
284 throughout the rostrocaudal axis of each LS subregion.

285 ***Quantification of Mchr1 mRNA expression.*** Representative images from negative  
286 control tissue, corresponding to each probe slice, were adjusted using lookup table values (LUTs;  
287 NIS Elements) until the image appeared black to eliminate background fluorescence from any  
288 *dapB* hybridization. This set of LUTs were averaged and applied to images of *Mchr1*  
289 hybridization signals to subtract background fluorescence resulting from non-specific binding.

290 *Mchr1* hybridization was visualized by Cy3 fluorescence and appeared as punctate red  
291 dots, which were far fewer after background correction. Only dots colocalizing to a DAPI-  
292 stained nuclei were included in our analyses (Supporting Figure 1Bii). A DAPI-stained nucleus  
293 colocalizing with clusters of 3+ red dots were labeled as a *Mchr1*-expressing neuron and marked  
294 by a red-filled circle (Supporting Figure 1Bii). In the event that mRNA dots appeared between  
295 two DAPI-labeled nuclei, only one cell would be reported, thus it is possible that we are  
296 underestimating the number of *Mchr1* cells available in the LS. We counted the number of red-  
297 filled circles within the LS of each available brain slice.

298           **Quantification of MCHR1 protein expression.** Neuronal MCHR1 expression was  
299 counted from confocal images of NeuroTrace-labelled cells, ciliary MCHR1, and NeuN  
300 immunoreactivity visualized by NeuroTrace 435/455, Cy3, and Alexa Fluor 488 fluorescence,  
301 respectively. An orange-filled circle (Illustrator) was placed over NeuroTrace and NeuN-ir  
302 neurons marked by an MCHR1-ir primary cilium (Supporting Figure 1Cii). The number of  
303 circles were quantified within the LS of each available brain slice.

304           **Mapping.** The fiber tracings and filled circle labels were kept in individual layers of the  
305 Adobe Illustrator file so that each layer could be easily separated and mapped onto the  
306 corresponding level of the *ARA* template (Dong, 2008). The collection of fiber and circle labels  
307 was copied, resized, and adjusted so that the representation of the experimental LS fit the shape  
308 of the LS shown in the atlas reference template. In this way, neurons were mapped to their  
309 correct position relative to the unique neuroanatomical boundaries specific to the animal, despite  
310 physical differences unique to the animal (such as size and shape of brain regions). Individual  
311 subregions of the LS were mapped one-by-one to maintain accuracy in relative position and  
312 distribution of fibers and neurons (Supporting Figure 1Aiii, Biii, Ciii).

313           **Appositions.** Direct physical contact between fiber and soma or cilia was assessed using  
314 consecutive confocal Z-stack slices. Fiber contacts were referred to as appositions to the  
315 membrane where no visible space appeared between the fiber and cell membrane along the  
316 orthogonal *XZ* and *YZ* projections (Krimer *et al.*, 1997; Lambe *et al.*, 2000; Bouyer & Simerly,  
317 2013). Contacts were determined at a physical zoom magnification of 2400× or greater, which  
318 permitted the detection of at least 0.4 μm gaps.

319           **Electrophysiology**

320           ***Slice preparation.*** Mice were anesthetized with an injection of chloral hydrate (700  
321 mg/kg, i.p.) and transcardially perfused with a carbogenated (95% O<sub>2</sub>, 5% CO<sub>2</sub>), ice cold  
322 artificial cerebrospinal fluid (ACSF) solution containing (in mM) 118 NaCl, 3 KCl, 1.3 MgSO<sub>4</sub>,  
323 1.4 NaH<sub>2</sub>PO<sub>4</sub>, 5 MgCl<sub>2</sub>, 10 glucose, 26 NaHCO<sub>3</sub>, 0.5 CaCl<sub>2</sub> (300 mOsm/L). The brain was  
324 removed from the skull and sliced at 250 μm using a vibrating microtome (VT1000s, Leica  
325 Biosystems, Buffalo Grove, IL) in cold, carbogenated ACSF. Slices containing the LS were  
326 transferred to glucose-based ASCF containing (in mM) 124 NaCl, 3 KCl, 1.3 MgSO<sub>4</sub>, 1.4  
327 NaH<sub>2</sub>PO<sub>4</sub>, 10 glucose, 26 NaHCO<sub>3</sub>, 2.5 CaCl<sub>2</sub> (300 mOsm/L) for 10 min (37°C) and then  
328 allowed to recover at RT for at least one hour prior to slice recording.

329           ***Slice recording.*** Slices containing the LS were bisected and transferred to the recording  
330 chamber where they were continuously perfused with carbogenated, glucose-based ACSF  
331 (31°C). Slice recordings were performed on three separate electrophysiology rigs. Cells were  
332 visualized with infrared differential interference contrast microscopy at 40× magnification on  
333 either an Examiner.A1 microscope (Zeiss, Oberkochen, Germany) equipped with an AxioCam  
334 camera (Zeiss) and Axiovision software (Zeiss), or with an Eclipse FN1 microscope (Nikon)  
335 equipped with a pco.panda 4.2 camera (Excelitas PCO GmbH, Kelheim, Germany) and NIS-  
336 Elements Imaging software (Nikon).

337           Whole-cell patch-clamp recordings were performed using borosilicate glass pipettes (7–9  
338 MΩ) backfilled with a potassium-based internal pipette solution containing (in mM) 120 K-  
339 gluconate, 10 KCl, 10 HEPES, 1 MgCl<sub>2</sub>, 1 EGTA, 4 MgATP, 0.5 NaGTP, 10 phosphocreatine  
340 (290 mOsm/L, pH 7.24) to assess membrane properties, ionic conductances, and glutamatergic  
341 events. Internal pipette solution with an increased chloride concentration contained (in mM) 109  
342 K-gluconate, 22 KCl, 10 HEPES, 1 MgCl<sub>2</sub>, 1 EGTA, 0.03 CaCl<sub>2</sub>, 4 MgATP, 0.5 NaGTP, 9



343 phosphocreatine (290 mOsm/L, pH 7.24). A cesium-based internal pipette solution used to  
344 record GABAergic events contained (in mM) 128 CsMS, 11 KCl, 10 HEPES, 0.1 CaCl<sub>2</sub>, 1  
345 EGTA, 4 MgATP, 0.5 NaGTP (290 mOsm/L, pH 7.24). For recordings measuring membrane  
346 properties, 0.4% biocytin (Cayman Chemical, Ann Arbor, MI) was added to the internal pipette  
347 solution to allow for post-hoc immunohistochemical labeling and visualization of recorded cells.  
348 Recordings of electrical activity were generated using a MultiClamp 700B amplifier (Molecular  
349 Devices, San Jose, CA) and digitized by a Digidata 1440A (Molecular Devices) or using an  
350 Axopatch 200B amplifier (Molecular Devices) and digitized by a Digidata 1322A (Molecular  
351 Devices). All traces were acquired using pClamp 10.3 software (Molecular Devices) and filtered  
352 at 1 kHz.

353 ***Drug treatment.*** Following a baseline period of at least 5 min, MCH (3 μM; H-1482;  
354 Bachem, Torrance, CA) was bath applied into the recording chamber for approximately 5 min  
355 followed by a washout period in ACSF. Where applicable, tetrodotoxin (TTX; 500 nM; T-550,  
356 Alomone labs, Jerusalem, Israel), TC-MCH 7c (10 μM; 4365, Tocris, Toronto, Ontario, Canada),  
357 and bicuculline (30 μM; 14343, MilliporeSigma) were applied to the slice during the baseline  
358 period approximately 10 min prior to MCH application and maintained over the washout period.  
359 Calphostin C (100 nM; HB0160, Hello Bio Inc., Princeton, NJ) prepared and maintained in the  
360 dark until it was illuminated by a bright light within the slice recording chamber was applied to  
361 the slice for 20–30 min prior to MCH application. Antagonists were only added to cells that were  
362 hyperpolarized by a puff of MCH. All drugs were prepared from stock solution then dissolved  
363 into ACSF immediately prior to application.

364 ***Puff application.*** In experiments elucidating the membrane or intracellular mechanisms  
365 underlying the effects of MCH, we first delivered a short puff of MCH to a patched cell to

366 identify those cells that responded with a reversible membrane hyperpolarization. To deliver the  
367 MCH puff, a second borosilicate glass “puff” pipette was filled with 3  $\mu$ M MCH solution and  
368 lowered into the slice within 30–40  $\mu$ m from the patched cell. A gradual positive pressure was  
369 manually applied to the puff pipette for 5–10 seconds until the MCH solution reached the  
370 patched cell.

371 ***Biocytin immunohistochemistry.*** Some brain slices used for electrophysiology  
372 recordings were post-fixed with 10% formalin to use for post-hoc immunohistochemical  
373 staining. The slices containing the biocytin-filled cells were rinsed in PBS (six 5-min washes),  
374 blocked in NDS (2 hours; RT), incubated with a streptavidin-conjugated Cy3 antibody (1:500)  
375 prepared in NDS (2 hours; RT), and then washed in PBS for 10 min. The slices were then  
376 washed with two more exchanges of PBS containing DAPI (1:2,000; Thermo Fisher Scientific)  
377 for 10 min. Brain slices were then mounted to Superfrost Plus microscope slides and  
378 coverslipped with ProLong Diamond Antifade Mountant.

## 379 **Experimental design and statistical analyses**

380 ***Anatomical studies.*** Male and female mice wildtype mice (8–10 weeks) were used in a  
381 between-subject design to assess the distribution of MCH-ir fibers, *Mchr1* mRNA, and MCHR1  
382 immunoreactivity. Comparisons between LS subregions or across LS levels were determined by  
383 two-way mixed model ANOVA with Tukey post-hoc testing, as not all LS levels can be captured  
384 in every brain sample.

385 ***Slice recording.*** Acute brain slices were prepared from male and female wildtype mice  
386 (38 male, 30 female) aged 5–23 weeks. Cells were recorded from two to three slices containing  
387 the LS and corresponding to Bregma 1.145–0.345 mm. Data sets included 1–4 cells per mouse.

388           **Resting membrane potential (RMP).** Only neurons that exhibited a stable membrane  
389 potential (varied <5 mV) for 5 minutes prior to drug application were included in our data  
390 analyses. All voltages were corrected for a +15 mV liquid junction potential. For bath  
391 applications, RMP was sampled every 1 s using Clampfit 10.7 (Molecular Devices) and binned  
392 into 30 s increments. Control value was the mean RMP averaged over 1 min immediately prior  
393 to MCH application. The change in RMP ( $\Delta$  RMP) was determined at the peak effect of MCH,  
394 which was within 4–8 min of MCH application and following washout 5–10 min later. In puff  
395 experiments, RMP was sampled every 500 ms and binned into 2-second increments, the  $\Delta$  RMP  
396 elicited by MCH was sampled 10–25 s after the puff. Within-group designs comparing control,  
397 MCH, and washout conditions were analysed using a repeated measure one-way ANOVA with  
398 Tukey post-hoc testing. Comparisons of  $\Delta$  RMP over time between two drug treatment  
399 conditions were analysed using a repeated measure two-way ANOVA. Comparisons of  $\Delta$  RMP  
400 after or at peak effect of drug treatment were compared using a one-way ANOVA with Tukey  
401 post-hoc testing.

402           ***I–V curve.*** Ionic conductance was measured in voltage clamp from a holding potential  
403 ( $V_h$ ) of –75 mV. Descending 10 mV voltage steps (250 ms) were applied from –55 mV to –125  
404 mV. The mean reversal potential ( $V_{rev}$ ) was averaged based on the  $V_{rev}$  for each cell, which was  
405 determined as the  $x$ -intercept calculated from a line equation where the slope is calculated from  
406 the –55 mV and –65 mV steps or from current values at two adjacent voltage steps where the  
407 current changes from a negative to a positive value, where applicable. The  $V_{rev}$  was compared to  
408 the theoretical equilibrium potential of the chloride ion ( $E_{Cl}$ ) using a one-sample  $t$  test. Between-  
409 group differences in net currents evoked following MCH application in the absence or presence

410 of bicuculline were compared using repeated measures two-way ANOVA with Bonferroni post-  
411 hoc comparison.

412 **Synaptic activity.** Spontaneous (sIPSC) or miniature (mIPSC) inhibitory postsynaptic  
413 current events were recorded at  $V_h = -20$  mV while excitatory post synaptic currents (sEPSC,  
414 mEPSC) were recorded at  $V_h = -75$  mV. The IPSC and EPSC frequency were analysed using  
415 MiniAnalysis (Synaptosoft) and binned into 30-second increments. The control value was taken  
416 as the mean of a 1 min sample between 0 and 4.5 min prior to MCH application. The percent  
417 change in frequency and amplitude were determined at the peak effect of MCH between 2 and  
418 9.5 min after the onset of MCH application. The washout was taken between 10 and 19 min after  
419 MCH application. Statistical significance was determined using a repeated measure one-way  
420 ANOVA with Tukey post-hoc testing.

421 We generated cumulative probability plots by pooling the amplitude and interevent  
422 intervals from 200 IPSC events or 50 EPSC events from each cell from baseline, MCH, and  
423 washout recording periods. Differences in the distribution of IPSC or EPSC amplitudes or  
424 interevent intervals in cumulative probability plots were analysed using the Kolmogorov-  
425 Smirnov  $t$  test.

426 **Graphs and illustrations.** All data graphs were generated using Prism 9 (GraphPad  
427 Software, San Diego, CA). Results were considered statistically significant at  $p < 0.05$ .  
428 Representative sample traces data were exported from Clampfit and plotted in Origin 2018  
429 (OriginLab Corporation, Northampton, MA). Manuscript figures were assembled in Illustrator.

430

431 **Results**

432 In order to identify potential sites of MCH action within the LS, we quantified the  
433 relative expression of MCH-ir fibers (Figure 1A), *Mchr1* mRNA (Figure 1B), and MCHR1  
434 receptors (Figure 1C) in each subregion and level of the LS and then mapped their distribution  
435 throughout the rostrocaudal axis of the LS that spans 2.125 mm between *ARA* level (L) 36 and  
436 L57.

### 437 **Distribution of MCH-ir fibers throughout the LS**

438 To maximize the detection of MCH-ir fibers, we performed our immunohistochemical  
439 stains using tyramide signal amplification. We then traced these fiber projections so that they can  
440 be mapped onto *ARA* templates with reference to Nissl-based parcellations and systematically  
441 examine the distribution of MCH-ir fibers throughout the LS. The density and pattern of MCH-ir  
442 fiber expression was comparable between males and females (Supporting Figure 2), so their  
443 datasets were combined to assess the overall MCH-ir fiber density across the LS.

444 The LS includes the rostral LS (LSr), caudal LS (LSc), and ventral LS (LSv). The LSr  
445 comprised the largest cytoarchitectural subdivision of the LS, and majority of MCH-ir fibers in  
446 the LS were found in the LSr ( $F(2, 12) = 10.33$ ,  $p = 0.0025$ ). Notably, MCH-ir fiber density was  
447 more abundant in the ventral than dorsal aspects of the LSr (Figure 1Ai–iii). Near the peak *ARA*  
448 level of MCH-ir expression, there was a distinctive pattern of MCH-ir fibers that were more  
449 concentrated at the midline or along the medial LSr border adjacent to the medial septal nucleus,  
450 along the lateral LSr border adjacent to the lateral ventricle, and along the ventral LSr border  
451 abutting the nucleus accumbens, lateral preoptic area, or bed nuclei of the stria terminalis (Figure  
452 1Aiv; see Supporting Figure 2 for MCH-ir fiber maps at all *ARA* levels of the LS).

453 MCH-ir fiber density differed throughout the anteroposterior axis of the LS ( $F(16, 99) =$   
454  $4.46, p < 0.0001$ ), and MCH-ir fiber density in the LSr gradually increased by nearly two-fold at  
455 its peak between L45–L49 and then diminished posteriorly (Figure 1A $\nu$ ). The cytoarchitectural  
456 boundary of the LSc is dorsal to the LSr, begins around L44, and then persists throughout the LS.  
457 The LSc is a small LS subregion and comprised relatively few dispersed MCH-ir fibers within  
458 the overall LS (Figure 1A $\nu$ ). The LS $\nu$  emerged posteriorly in the LS starting at L52, and the LS $\nu$   
459 contained a moderate and evenly distributed MCH-ir fiber density (Figure 1A $\nu$ ).

#### 460 **Distribution of *Mchr1*-expressing LS cells**

461 To determine if the LS expressed receptors for MCH, we used RNAscope to label *Mchr1*  
462 mRNA hybridization in the LS; positive staining for *Mchr1* mRNA appeared as punctate dots.  
463 We observed cells that contained 1–2 dots, and while even low amounts of mRNA may be  
464 translated to protein (Greer et al., 2016; Lipo et al., 2022), we only considered cells with 3+ dots  
465 to provide a conservative estimation of *Mchr1*-positive cells (Figure 1B). Similar to the  
466 distribution of MCH-ir fibers, *Mchr1* hybridization was more prominent in the LSr ( $F(2, 72) =$   
467  $116.1, p < 0.0001$ ), where *Mchr1* cells were most prevalent in the ventral than dorsal LSr (Figure  
468 1B*i–iii*), where they tend to be along the lateral LSr borders (Figure 1B*iv*; see Supporting Figure  
469 3 for representative maps of *Mchr1* hybridization at all ARA levels of the LS).

470 The distribution of *Mchr1*-expressing cells was similar between males and females  
471 (Supporting Figure 3). The number of *Mchr1* cells differed rostrocaudally within the LS ( $F(16,$   
472  $72) = 3.47, p = 0.0001$ ) and peaked at L49 (Figure 1B $\nu$ ). Of the identified *Mchr1*-expressing  
473 cells, 89% were found in the LSr and only 10% and 1% were located in the LSc and LS $\nu$ ,  
474 respectively. In the posterior levels at L52 and L53, there were few *Mchr1* cells in the LSr but  
475 there was an increasing proportion of *Mchr1* cells dorsally in the LSc.

## 476 **Distribution of MCHR1-expressing LS cells**

477 To determine if *Mchr1* transcripts were translated to protein, we performed an  
478 immunohistochemical stain to label MCHR1 immunoreactivity. As MCHR1 is concentrated on  
479 the primary cilium of neurons (Diniz et al., 2020), we determined its colocalization to a  
480 NeuroTrace and/or NeuN-ir soma (Figure 1C). The vast majority (93%) of MCHR1 cells were in  
481 the LSr ( $F(2, 69) = 84.95, p < 0.001$ ), and the pattern of MCHR1 immunoreactivity was similar  
482 to *Mchr1* mRNA hybridization. MCHR1-expressing cells clustered toward the lateral border and  
483 ventral half of the LSr, while the medial LSr bordering the medial septum had few MCHR1 cells  
484 at all levels of the LS (Figure 1Ci-iv; see Supporting Figure 4 for representative maps of  
485 MCHR1-expressing cells at all ARA levels of the LS).

486 MCHR1-expressing cells were differentially distributed throughout the anteroposterior  
487 axis of the LS ( $F(16, 69) = 3.65, p < 0.0001$ ) and peaked between L48 and L49, where there  
488 were 5-fold more MCHR1 cells than in the anterior or posterior LS (Figure 1Cv). About 5% of  
489 MCHR1 cells were found in the LSc and were distributed across several ARA levels. The LSv  
490 comprised ~2% of MCHR1 cells, which emerged posteriorly and were clustered at L55 (Figure  
491 1Cv). Interestingly, while 99.9% MCHR1-ir cilia in LSr and LSc colocalized to a NeuN-labeled  
492 soma, about 56% of MCHR1-ir cilia in the LSv did not colocalize to NeuN, though they were  
493 associated with a NeuroTrace-labeled cell.

## 494 **Proximity of MCH-ir fibers at MCHR1-expressing LS cells**

495 MCH is known to reach its receptor and target site by volume transmission (Noble *et al.*,  
496 2018). However, as MCH fibers and MCHR1 are featured in similar LS regions dorsoventrally  
497 and rostrocaudally (Figure 1), we also assessed the proximity between MCH-ir fibers and *Mchr1*

498 mRNA or MCHR1 protein expression. MCH-ir fibers were present around *Mchr1*-expressing  
499 cells in the ventral LSr (Figure 2A) and in some cases appeared to be in close contact with an  
500 *Mchr1*-expressing cell (Figure 2B). However, since *Mchr1* hybridization was localized to DAPI-  
501 labeled nuclei, it was not possible to assess if MCH-ir fibers formed direct appositions with a  
502 *Mchr1* cell. To determine if MCH fibers may come in direct contact with MCHR1-expressing LS  
503 cells, we performed a stain for MCHR1 protein, MCH-ir fibers, and the neuronal marker NeuN  
504 to mark the cell body and examined MCH fiber appositions on the soma or cilia of MCHR1-  
505 expressing cells. The majority of MCHR1-expressing LS cells (111 of 123) were not contacted  
506 by MCH-ir fibers either at their cell bodies or cilia (Figure 2C). Most MCHR1 cells were not  
507 immediately adjacent to visible MCH-ir fibers, and some MCH-ir varicosities came within  
508 0.4  $\mu\text{m}$  of MCHR1-labeled cilia or their affiliated cell body without making direct physical  
509 contact (Figure 2D). Interestingly, MCH-ir fibers directly contacted about 10% of MCHR1 LS  
510 cells examined, and these appositions may occur at the NeuN-labeled cell body (Figure 2E) or  
511 MCHR1-ir cilium (Figure 2F). These findings suggested that MCH is preferentially transmitted  
512 through diffusion from local MCH fibers in the LS, but MCH fibers may also be in direct contact  
513 with LS cells for localized actions.

#### 514 **MCH inhibited LS cells**

515 As local diffusion may be the primary mode of MCH transmission within the LS, we  
516 hypothesized that substantive spatial overlap between the distribution of MCH-ir fibers and  
517 MCHR1 would define putative hotspots for MCH action. We found that the spatial overlap  
518 between the expression of MCH-ir fibers, *Mchr1* mRNA, and MCHR1 protein in the LS was  
519 most prominent toward the lateral and ventral borders of the LSr (Figure 3A), which formed our



520 focus region for identifying MCH-responsive LS cells and defining the mechanisms of MCH  
521 action.

522 We prepared acute brain slices containing the LS and performed whole-cell patch-clamp  
523 recordings from cells along the ventrolateral border of the LSr (Figure 3B). Bath application of  
524 MCH (3  $\mu$ M) reversibly hyperpolarized the RMP of LS cells by  $-6.1 \pm 1.1$  mV ( $n = 12$ ;  $F(2, 22)$   
525  $= 13.38$ ,  $p = 0.002$ ; Figure 3C). This MCH-mediated hyperpolarization was observed in about  
526 half of LSr neurons recorded from both male (7/12 cells) and female (5/9 cells) mice. We did not  
527 detect any differences in the magnitude of hyperpolarization between cells from male ( $-6.3 \pm 1.5$   
528 mV,  $n = 7$ ) or female mice ( $-5.6 \pm 2.0$ ,  $n = 5$ ;  $t(10) = 0.29$ ,  $p = 0.78$ ), thus data from both male  
529 and female mice were combined.

530 To determine if MCH acts directly on LS cells, we pretreated the slice with TTX (500  
531 nM) to block action potential-dependent activity. Subsequent co-application of MCH in the  
532 presence of TTX also hyperpolarized LS cells by  $-7.7 \pm 1.5$  mV ( $n = 7$ ;  $F(2, 12) = 16.69$ ,  $p =$   
533  $0.002$ ; Figure 3D), which indicated that MCH directly inhibited LS cells.

#### 534 **MCH-mediated hyperpolarization is MCHR1-dependent**

535 We screened for MCH-sensitive LS neurons by applying a short puff of MCH (Figure  
536 4Ai). We found that a single MCH puff ( $MCH_{\text{puff}}$ ) produced a small but reversible RMP  
537 hyperpolarization ( $-2.0 \pm 0.4$  mV,  $n = 8$ ) that was sufficient to identify an MCH-sensitive neuron  
538 (Figure 4Aii). A second  $MCH_{\text{puff}}$  applied at least three minutes later also produced a similar  
539 ( $-1.6 \pm 0.3$  mV,  $n = 8$ ) hyperpolarization (Figure 4Aii, Aiii). By contrast, a puff application of  
540 bath ACSF did not alter the RMP ( $0.5 \pm 0.3$  mV,  $n = 9$ ;  $F(2, 22) = 18.17$ ,  $p < 0.0001$ ; Figure  
541 4Aii, Aiii).

542 To confirm that MCH-mediated hyperpolarization was occurring via the MCHR1  
543 receptor, we applied MCH in the presence of the MCHR1 antagonist, TC-MCH 7c. After  
544 identifying an MCH-sensitive cell ( $MCH_{puff}$ :  $-1.6 \pm 0.3$  mV,  $n = 7$ ), we pretreated the slice with  
545  $10 \mu\text{M}$  TC-MCH 7c for 10–15 min. There was a main effect of the MCHR1 antagonist ( $F(2, 18)$   
546  $= 21.24$ ;  $p < 0.0001$ ), as a second  $MCH_{puff}$  applied in the presence of TC-MCH 7c no longer  
547 produced a hyperpolarization ( $-0.2 \pm 0.2$  mV,  $n = 7$ ;  $p = 0.013$ ; Figure 4Bi, Bii). Similarly,  
548 MCH application via the slice chamber over a longer duration also did not elicit a membrane  
549 hyperpolarization in the presence of TC-MCH 7c ( $MCH_{bath}$ :  $1.2 \pm 0.4$  mV,  $n = 7$ ;  $p < 0.0001$ ;  
550 Figure 4Bii, Biii). These findings indicated that MCHR1 activation mediated the inhibitory  
551 effects of MCH.

#### 552 **MCH activated a chloride channel to hyperpolarize LS cells**

553 We next sought to determine the ionic basis of the MCH-mediated hyperpolarization. We  
554 compared the current–voltage (I–V) relationship of MCH-sensitive cells before and after a full  
555 bath application of MCH. We determined the I–V relationship of the cell by recording the  
556 steady-state current change elicited by each voltage step (Figure 5Ai). MCH application elicited  
557 a membrane current with a  $V_{rev}$  of  $-63.7 \pm 8.1$  mV ( $n = 8$ ), which corresponded to the predicted  
558  $E_{Cl}$  ( $-63.1$  mV) under our conditions ( $t(7) = 0.17$ ,  $p = 0.87$ ; Figure 5Aii). We then elevated the  
559 internal chloride concentration to determine if MCH-mediated inhibition was chloride-  
560 dependent. With an elevated chloride internal, MCH activated a smaller amplitude current ( $n=7$ ;  
561  $t(13) = 1.8$ ,  $p = 0.047$ ) with a  $V_{rev}$  of  $-48.1 \pm 5.1$  mV that corresponded with the new predicted  
562  $E_{Cl}$  of  $-44.8$  mV ( $t(6) = 0.64$ ,  $p = 0.55$ ; Figure 5Aii, Aiii).

563 The net current elicited by MCH revealed an outward rectification at depolarizing  
564 potentials. These properties are consistent with that of ionotropic  $GABA_A$  receptor currents

565 (Valeyev *et al.*, 1999) expressed in the LS (Heldt & Ressler, 2007; Hörtnagl *et al.*, 2013) and that  
566 contribute a tonic chloride conductance (Lee & Maguire, 2014). To determine if the MCH-  
567 mediated chloride current is related to the activation of GABA<sub>A</sub> receptors, we next pretreated the  
568 slice with the GABA<sub>A</sub> receptor antagonist bicuculline (30 μM), and subsequent MCH co-  
569 application did not evoke a change in membrane current ( $t(11) = 2.57$ ,  $p = 0.026$ ; Figure 5Aiii).  
570 There was a significant interaction in the effect of bicuculline on the MCH-mediated current  
571 elicited across the voltage range ( $F(7, 77) = 7.38$ ,  $p < 0.0001$ ; Figure 5Aii) thus supporting a  
572 MCH-mediated activation of a GABA<sub>A</sub> receptor.

573 To determine if this GABA<sub>A</sub> receptor chloride conductance underlies the MCH-mediated  
574 hyperpolarization, we applied bicuculline to an MCH<sub>puff</sub>-sensitive cell ( $-1.3 \pm 0.2$  mV,  $n = 9$ ).  
575 Bicuculline pretreatment abolished the inhibitory effects of MCH ( $F(2, 24) = 31.78$ ,  $p < 0.0001$ ),  
576 as neither a short MCH<sub>puff</sub> ( $-0.1 \pm 0.2$  mV,  $n = 9$ ;  $p = 0.027$ ) nor prolonged MCH<sub>bath</sub> application  
577 ( $2.0 \pm 0.4$  mV,  $n = 9$ ;  $p < 0.0001$ ) elicited a membrane hyperpolarization (Figure 5B). These  
578 findings indicated that a bicuculline-sensitive current underlies the inhibitory effect of MCH at  
579 LS cells and suggested that MCH may regulate the activation of a chloride conductance.

580 MCHR1 activation can couple to multiple intracellular G proteins, but most commonly to  
581 G<sub>i</sub>/G<sub>o</sub> proteins or G<sub>q</sub> proteins (Saito *et al.*, 1999; Hawes *et al.*, 2000). As PKC can be activated  
582 following MCHR1 stimulation (Pissios *et al.*, 2003) and is linked to GABA<sub>A</sub> receptor activation  
583 (Poisbeau *et al.*, 1999) and increased chloride conductance via GABA<sub>A</sub> receptors (Lin *et al.*,  
584 1996), we determined if MCH-mediated inhibition was linked to PKC activity. We first  
585 identified MCH-responsive cells (MCH<sub>puff</sub>:  $-2.1 \pm 0.4$  mV,  $n = 5$ ) and pretreated the LS brain  
586 slice with 100 nM calphostin C, a PKC inhibitor. Interestingly, MCH application in the presence  
587 of calphostin C did not hyperpolarize the RMP (MCH<sub>puff</sub>:  $-0.2 \pm 0.2$ ,  $n = 5$ ;  $p = 0.038$ ) even

588 when MCH was applied for an extended duration ( $MCH_{\text{bath}}$ :  $2.3 \pm 1.1$  mV,  $n = 5$ ;  $p = 0.030$ ).  
589 These findings indicated a main effect of calphostin C treatment ( $F(2, 8) = 11.92$ ;  $p = 0.004$ ;  
590 Figure 5C). Taken together, these results suggested that MCH activated a GABA<sub>A</sub> receptor  
591 chloride current in a PKC-dependent manner.

### 592 **MCH did not inhibit GABAergic or glutamatergic input on LS cells**

593 Previous MCH research showed that MCH can act via a presynaptic mechanism (Zheng  
594 *et al.*, 2005), therefore we next determined if MCH also acts presynaptically in the LS. The LS  
595 comprises primarily GABAergic neurons with reciprocal connections to other LS cells  
596 (Gallagher & Hasuo, 1989; Sheehan *et al.*, 2004; Zhao *et al.*, 2013). We observed a high baseline  
597 frequency of sIPSC events ( $7.2 \pm 3.1$  Hz,  $n = 8$ ) that was consistent with high GABAergic tone at  
598 LS cells (Carette *et al.*, 2001; Figure 6A). MCH application produced a reversible rightward shift  
599 in the distribution of sIPSC interevent intervals (control vs. MCH:  $n = 8$ ;  $D(8) = 0.27$ ,  $p <$   
600  $0.0001$ ; MCH vs. wash:  $n = 8$ ;  $D(8) = 0.30$ ,  $p < 0.0001$ ; Figure 6B, C) that reflected a 43%  
601 decrease in sIPSC frequency (baseline:  $7.2 \pm 3.1$  Hz; MCH:  $5.6 \pm 2.7$  Hz; wash:  $6.4 \pm 3.0$  Hz;  $n$   
602  $= 8$ ;  $F(2, 21) = 17.39$ ,  $p < 0.0001$ ; Figure 6C *inset*). In addition to decreasing sIPSC frequency,  
603 MCH produced a reversible leftward shift in the distribution of sIPSC event amplitudes (control  
604 vs. MCH:  $n = 8$ ,  $D(8) = 0.23$ ,  $p < 0.0001$ ; MCH vs. wash:  $n = 8$ ,  $D(8) = 0.30$ ,  $p < 0.0001$ ; Figure  
605 6D) but did not decrease the mean amplitude of sIPSC events (control:  $32.2 \pm 5.0$  pA; MCH:  
606  $29.8 \pm 5.5$  pA; wash:  $31.9 \pm 5.9$  pA;  $n = 8$ ;  $F(2, 21) = 0.67$ ,  $p = 0.52$ ; Figure 6D *inset*).

607 We pretreated the slice with 500 nM TTX to abolish activity-dependent synaptic  
608 transmission and recorded mIPSC events to determine if MCH would act on GABAergic  
609 presynaptic terminals (Figure 6E–H). Interestingly, co-application of MCH in TTX did not affect  
610 the distribution of interevent intervals (control vs MCH:  $n = 8$ ;  $D(8) = 0.10$ ;  $p = 0.27$ ; Figure 6G)

611 and, accordingly, did not change mIPSC frequency (control:  $1.3 \pm 0.4$  Hz; MCH:  $1.2 \pm 0.3$  Hz;  
612 wash:  $1.3 \pm 0.4$  Hz;  $n = 8$ ;  $F(2, 21) = 1.09$ ,  $p = 0.35$ ; Figure 6G *inset*). Likewise, MCH also did  
613 not change the distribution of mIPSC amplitudes (control vs MCH:  $n = 8$ ,  $D(8) = 0.08$ ,  $p = 0.47$ ;  
614 Figure 6H) or mean mIPSC amplitudes (control:  $21.2 \pm 1.3$  pA; MCH:  $21.4 \pm 1.4$  pA; wash:  $21.0$   
615  $\pm 1.3$  pA;  $n = 8$ ;  $F(2, 21) = 0.18$ ,  $p = 0.84$ ; Figure 6H *inset*). These findings suggested that MCH  
616 may not regulate presynaptic GABAergic inputs to LS cells.

617         The LS also receives glutamatergic input from different regions such as the hippocampus  
618 (Swanson & Cowan, 1977; Risold & Swanson, 1997a), which has also been shown to express  
619 MCHR1 (Saito *et al.*, 1999). Therefore, we next examined if MCH can also change excitatory  
620 input to the LS. Spontaneous glutamatergic inputs to LS cells occur at a low frequency ( $1.3 \pm 0.5$   
621 Hz,  $n = 9$ ), and there was a slow rundown of sEPSC frequency over time (Figure 7A, B) that  
622 shifted the distribution of interevent intervals throughout the recording (control vs MCH:  $n = 9$ ,  
623  $D(9) = 0.54$ ,  $p < 0.0001$ ; control vs wash:  $n = 9$ ,  $D(9) = 0.42$ ,  $p = 0.0003$ ; Figure 7C).  
624 Nonetheless, MCH did not alter sEPSC frequency (control:  $1.3 \pm 0.5$  Hz; MCH:  $1.3 \pm 0.5$  Hz;  
625 wash:  $1.4 \pm 0.6$  Hz;  $n = 9$ ;  $F(2, 16) = 0.60$ ,  $p = 0.55$ ; Figure 7C *inset*). MCH application also did  
626 not change the amplitude of sEPSC events (control:  $15.5 \pm 2.6$  pA; MCH:  $15.3 \pm 2.3$  pA; wash:  
627  $14.8 \pm 2.0$  pA;  $n = 9$ ;  $F(2, 16) = 0.07$ ,  $p = 0.91$ ), which also reflected a gradual rundown over  
628 time (control vs MCH:  $n = 9$ ,  $D(9) = 0.20$ ,  $p = 0.21$ ; control vs wash:  $n = 9$ ,  $D(9) = 0.26$ ,  $p =$   
629  $0.05$ ; Figure 7D).

630         In the presence of TTX, MCH had no effect on the frequency (control:  $2.7 \pm 1.0$  Hz;  
631 MCH:  $2.6 \pm 1.0$  Hz; wash:  $2.6 \pm 1.0$  Hz;  $n = 6$ ;  $F(2, 10) = 1.35$ ;  $p = 0.32$ ; Figure 7E–G) or the  
632 amplitude (control:  $10.4 \pm 1.1$  pA; MCH:  $10.1 \pm 1.0$  pA; wash:  $10.2 \pm 1.0$  pA;  $n = 6$ ;  $F(2, 10) =$

633 0.06;  $p = 0.85$ ; Figure 7H) of mEPSC events. Taken together, these findings suggested that MCH  
634 did not affect excitatory synaptic input.

635

## 636 **Discussion**

637 MCHR1-expressing cells concentrated along the ventral and lateral boundaries of the LS  
638 and overlapped with the distribution pattern of MCH-ir fibers. We performed patch-clamp  
639 recordings from these MCHR1-rich hotspots and revealed a novel mechanism of MCH action in  
640 the LS. Pharmacological application of MCH directly hyperpolarized LS cells, but MCH did not  
641 alter synaptic input to LS cells. The inhibitory effects of MCH were MCHR1-dependent and  
642 mediated by an increased chloride current.

643 The coincident distribution pattern of *Mchr1* mRNA and MCHR1-ir cells in the LS  
644 implicated that these were MCH target sites. *Mchr1* hybridization signals can be seen throughout  
645 the LS but was most prominent in the LSr. This corresponded with *Mchr1* mRNA expression in  
646 the rat LS that was higher in the intermediate (Saito et al., 2001; i.e., mouse LSr) and ventral part  
647 of the LS (Bittencourt et al., 1992; i.e., mouse LSv) and lower in the dorsal part of the LS  
648 (Hervieu et al., 2000; i.e., mouse LSc). *Mchr1* hybridization signals reflected the presence of  
649 MCHR1 cells along the ventrolateral edge of the LSr anteriorly, as well as within the small LSv  
650 cluster posteriorly.

651 MCHR1-positive LS cells were distributed within or near MCH-ir fiber fields, which  
652 were also more abundant in the LSr than the LSc or LSv. Nerve terminals from MCH neurons  
653 are known to terminate in the LSr and form glutamatergic synapses to innervate LS cells (Chee  
654 *et al.*, 2015). Interestingly, glutamatergic nerve endings from MCH neurons terminated in the

655 dorsal zones of the LSr (Chee *et al.*, 2015; Liu *et al.*, 2022), where MCH-ir fibers were relatively  
656 sparse. Rather, MCH-ir fibers were prominent within the ventrolateral zones of the LSr where  
657 they spatially overlapped with MCHR1-expressing cells. MCH-ir fibers also extend into the  
658 medial zones of the LSr from the medial septum, but medially distributed MCH-ir fibers did not  
659 overlap with MCHR1-rich zones.

660         The proximity between MCH fibers and MCHR1-expressing LS cells implicated hotspots  
661 for MCHR1 activation. Most MCHR1 cells lie adjacent to but were not in contact with passing  
662 fibers and suggested that MCH is preferentially released extrasynaptically in the LS. MCH  
663 availability within the LS may also be a result of uptake from the lateral ventricle (Ruiz-Viroga  
664 *et al.*, 2021) to then reach MCHR1 LS cells by volume transmission (Noble *et al.*, 2018). This  
665 could be facilitated by MCHR1 expression along the primary cilium of neurons (Berbari *et al.*,  
666 2008; Diniz *et al.*, 2020) to detect MCH in the extracellular space (Diniz *et al.*, 2020).  
667 Furthermore, like in the nucleus accumbens (Sears *et al.*, 2010) and nucleus of the solitary tract  
668 (Zheng *et al.*, 2005) MCH-ir fibers can also be closely associated with LS cells, including  
669 MCHR1-expressing cells in the ventrolateral LS that were in direct physical contact with MCH-  
670 ir fibers. However, ultrastructural analyses would be required to determine if these contacts  
671 reflect active release sites. The functional contributions of local MCH release or MCH uptake  
672 from the ventricular space are not known (Ruiz-Viroga *et al.*, 2021) but may influence  
673 behaviours that transpire over a longer timeframe. Meanwhile, local sources of MCH like those  
674 in direct contact with MCHR1 LS cells may mediate rapid, acute responses to environmental  
675 stressors.

676         Functional MCHR1 activation directly hyperpolarized and suppressed action potential  
677 firing of LS cells. While MCH can act presynaptically by inhibiting glutamatergic input (Zheng

678 *et al.*, 2005), it did not regulate either glutamatergic or GABAergic input to the LS. The  
679 inhibitory effect of MCH was mediated by a bicuculline-sensitive chloride current, which  
680 suggested the activation of ionotropic GABA<sub>A</sub> receptors. While MCHR1 activation is known to  
681 couple to G<sub>i</sub>/G<sub>o</sub>-proteins (Gao, 2009), it can also couple to G<sub>q</sub>-proteins (Bächner *et al.*, 1999;  
682 Pissios *et al.*, 2003). MCHR1 coupling to the G<sub>q</sub> pathway may activate chloride currents  
683 (Bächner *et al.*, 1999) in a PKC-dependent manner (Pissios *et al.*, 2003), as PKC activation can  
684 increase chloride influx via GABA<sub>A</sub> receptors (Lin *et al.*, 1994, 1996b). The postsynaptic  
685 mechanisms linked to MCH-mediated inhibition, including at the medial septal nucleus (Wu *et*  
686 *al.*, 2009) and nucleus accumbens (Sears *et al.*, 2010), have involved the activation of potassium  
687 channels, thus our findings implicate a novel chloride-mediated mechanism underlying the  
688 inhibitory actions of MCH.

689         The LS may integrate MCH roles that increase feeding (Qu *et al.*, 1996; Rossi *et al.*,  
690 1997; Dilsiz *et al.*, 2020) and anxiety-related behaviours (Smith *et al.*, 2006; Dilsiz *et al.*, 2020)  
691 by suppressing LS activity. Photostimulating GABAergic LS cells reduces feeding (Xu *et al.*,  
692 2019), and GABA<sub>A</sub> and GABA<sub>B</sub>-mediated inhibition of LS cells can increase feeding (Gabriella  
693 *et al.*, 2022; Calderwood *et al.*, 2020). Since MCH can inhibit LS cells, MCH may thus increase  
694 feeding by downregulating GABAergic output from the LS. The LS is a notable region that  
695 regulates anxiety (Sheehan *et al.*, 2004), and this may be ascribed to its afferent or efferent  
696 connections. MCH dampens LS activity, which can elicit anxiogenesis. For example, inhibiting  
697 hippocampal projections to the LS increased anxiety-like behaviours (Parfitt *et al.*, 2017).

698         The LSc, LSr, and Lsv designations by the *Allen Reference Atlas* are based on  
699 cytoarchitectonic parcellation (Dong, 2008), but LS divisions can also be informed by afferent  
700 and efferent connections that overlap with the distribution of MCHR1 cells (Risold and



701 Swanson, 1997a; Risold and Swanson, 1997b). The ventrolateral LSr receives strong  
702 glutamatergic input from the ventral hippocampal CA1 (Risold and Swanson, 1997a) to suppress  
703 feeding and anxiety (Parfitt *et al.*, 2017). Additionally, there is a concentration of cells  
704 expressing the type 2 corticotropin-releasing factor receptor (*Crfr2*) in the lateral LSr that  
705 innervate the anterior hypothalamic nucleus (Risold & Swanson, 1997a; Bang *et al.*, 2022).  
706 Activating LS *Crfr2* terminals in the anterior hypothalamus promotes anxiety (Anthony *et al.*,  
707 2014).

708         The LS can also be divided into band-shaped domains informed by its chemoarchitecture  
709 (Risold and Swanson, 1997b). The distribution pattern of MCHR1-expressing LS cells  
710 corresponded to dorsolateral and ventrolateral LSr bands that overlap with enkephalin and  
711 urocortin immunoreactive fibers (Risold & Swanson, 1997b; Chen *et al.*, 2011) anteriorly. These  
712 fibers have been implicated in feeding and anxiety-regulated behaviours at the LS. Enkephalin  
713 immunoreactivity is lower when food is less abundant and may reflect food availability (Kovacs  
714 *et al.*, 2005). Enkephalin acts via the  $\mu$ -opioid receptor in the LS (Mansour *et al.*, 1994), and  
715 administration of a  $\mu$ -opioid receptor agonist into the LSr increases feeding (Calderwood *et al.*,  
716 2020) and anxiety-like behaviour in mice (le Merrer *et al.*, 2006). Urocortin activates CRFR2  
717 receptors in the ventrolateral LS (Van Pett *et al.*, 2000; Anthony *et al.*, 2014) and can inhibit  
718 feeding during stress (Stengel & Taché, 2014). Urocortin administration into the LS inhibits  
719 feeding and increases anxiety-like behaviour (Wang & Kotz, 2002; Bakshi *et al.*, 2007; Noguchi  
720 *et al.*, 2013) and activation of *Crfr2* LS cells also promotes anxiety (Anthony *et al.*, 2014).  
721 Interestingly, urocortin infusion into the LS can reduce orexin-mediated feeding (Wang & Kotz,  
722 2002) and given that orexin and MCH have complimentary roles on feeding (Barson *et al.*,

723 2013), interactions between urocortin and MCH may modulate feeding behaviour in response to  
724 stress.

725 MCH may also act via the LSv to mediate anxiety behaviours. MCHR1-expressing cells  
726 in the LSv may overlap with Substance P-immunoreactive fibers (Risold & Swanson, 1997b),  
727 and Substance P can have an anxiogenic effects in the LS (Gavioli *et al.*, 1999, 2002; Ebner *et al.*, 2008). The LSv receives glutamatergic input from the ventral hippocampus to promote  
728 coping mechanisms such as stress-induced grooming, which could help relieve feelings of stress  
729 and anxiety (Mu *et al.*, 2020). Given the inhibitory actions of MCH on the LS, it may thus act via  
730 the LSv to dampen such neuronal coping mechanisms.  
731

732 In conclusion, our findings showed that MCH inhibits the LS and suggests that MCH  
733 might converge with enkephalin and urocortin at the LSr, or with Substance P in the LSv, to  
734 fine-tune feeding and anxiety-related behaviours. We anticipated that the convergence of MCH  
735 fibers and MCHR1-expressing cells would assist in identifying hotspots underlying the action of  
736 MCH in the LS, and our electrophysiological recordings in these regions revealed a novel  
737 mechanism of MCH-mediated action that inhibited LS cells by increasing chloride conductance.

738 **References**

- 739 Adamantidis A, Thomas E, Foidart A, Tyhon A, Coumans B, Minet A, Tirelli E, Seutin V,  
740 Grisar T & Lakaye B (2005). Disrupting the melanin-concentrating hormone receptor 1 in  
741 mice leads to cognitive deficits and alterations of NMDA receptor function. *Eur J Neurosci*  
742 **21**, 2837–2844.
- 743 Adamantidis A & de Lecea L (2009). A role for Melanin-Concentrating Hormone in learning  
744 and memory. *Peptides (NY)* **30**, 2066–2070.
- 745 Anthony TE, Dee N, Bernard A, Lerchner W, Heintz N & Anderson DJ (2014). Control of  
746 stress-induced persistent anxiety by an extra-amygdala septohypothalamic circuit. *Cell* **156**,  
747 522–536.
- 748 Bächner D, Kreienkamp HJ, Weise C, Buck F & Richter D (1999). Identification of melanin  
749 concentrating hormone (MCH) as the natural ligand for the orphan somatostatin-like  
750 receptor 1 (SLC-1). *FEBS Lett* **457**, 522–524.
- 751 Bakshi VP, Newman SM, Smith-roe S, Jochman KA & Kalin NH (2007). Stimulation of Lateral  
752 Septum CRF 2 Receptors Promotes Anorexia and Stress-Like Behaviors□: Functional  
753 Homology to CRF 1 Receptors in Basolateral Amygdala. *J Neurosci* **27**, 10568–10577.
- 754 Bang JY, Zhao J, Rahman M, St-Cyr S, McGowan PO & Kim JC (2022). Hippocampus-Anterior  
755 Hypothalamic Circuit Modulates Stress-Induced Endocrine and Behavioral Response. *Front*  
756 *Neural Circuits*; DOI: 10.3389/fncir.2022.894722.
- 757 Barson JR, Morganstern I & Leibowitz SF (2013). Complementary roles of orexin and melanin-  
758 concentrating hormone in feeding behavior. *Int J Endocrinol* **2013**, 1–10.
- 759 Beekly BG, Frankel WC, Berg T, Allen SJ, Garcia-Galiano D, Vanini G & Elias CF (2020).  
760 Dissociated Pmch and Cre expression in lactating Pmch-Cre BAC transgenic mice. *Front*  
761 *Neuroanat* **14**, 1–15.
- 762 Berbari NF, Johnson AD, Lewis JS, Askwith CC & Mykytyn K (2008). Identification of Ciliary  
763 Localization Sequences within the Third Intracellular Loop of G Protein-coupled Receptors.  
764 *Mol Biol Cell* **19**, 1540–1547.
- 765 Bittencourt JC, Presse F, Arias C, Peto C, Vaughan J, Nahon J □L, Vale W & Sawchenko PE  
766 (1992). The melanin□concentrating hormone system of the rat brain: An immuno□ and  
767 hybridization histochemical characterization. *J Comp Neurol* **319**, 218–245.
- 768 Bono BS, Ly NKK, Miller PA, Williams-Ikhenoba J, Dumiaty Y & Chee MJ (2022). Spatial  
769 distribution of beta-klotho mRNA in the mouse hypothalamus, hippocampal region,  
770 subiculum, and amygdala. *J Comp Neurol* **530**, 1634–1657.
- 771 Bouyer K & Simerly RB (2013). Neonatal leptin exposure specifies innervation of  
772 presympathetic hypothalamic neurons and improves the metabolic status of leptin-deficient  
773 mice. *J Neurosci* **33**, 840–851.

- 774 Broberger C (1999). Hypothalamic cocaine- and amphetamine-regulated transcript (CART)  
775 neurons: histochemical relationship to thyrotropin-releasing hormone, melanin-  
776 concentrating hormone, orexin/hypocretin and neuropeptide Y. *Brain Res* **848**, 101–113.
- 777 Broberger C, de Lecea L, Sutcliffe JG, Ho`kfelt T & Ho`kfelt H (1998). Hypocretin/Orexin-and  
778 Melanin-Concentrating Hormone-Expressing Cells Form Distinct Populations in the Rodent  
779 Lateral Hypothalamus: Relationship to the Neuropeptide Y and Agouti Gene-Related  
780 Protein Systems. *J Comp Neurol* **402**, 460–474.
- 781 Calderwood MT, Tseng A & Glenn Stanley B (2020). Lateral septum mu opioid receptors in  
782 stimulation of feeding. *Brain Res* **1734**, 146648.
- 783 Carette B, Poulain P & Beauvillain JC (2001). Noradrenaline modulates GABA-mediated  
784 synaptic transmission in neurones of the mediolateral part of the guinea pig lateral septum  
785 via local circuits. *Neurosci Res* **39**, 71–77.
- 786 Chee MJS, Arrigoni E & Maratos-Flier E (2015). Melanin-concentrating hormone neurons  
787 release glutamate for feedforward inhibition of the lateral septum. *J Neurosci* **35**, 3644–  
788 3651.
- 789 Chee MJS, Pissios P & Maratos-Flier E (2013). Neurochemical characterization of neurons  
790 expressing melanin-concentrating hormone receptor 1 in the mouse hypothalamus. *J Comp*  
791 *Neurol* **521**, 2208–2234.
- 792 Chen P, Lin D, Giesler J & Li C (2011). Identification of urocortin 3 afferent projection to the  
793 ventromedial nucleus of the hypothalamus in rat brain. *J Comp Neurol* **519**, 2023–2042.
- 794 Croizier S, Franchi-Bernard G, Colard C, Poncet F, la Roche A & Risold PY (2010). A  
795 comparative analysis shows morphofunctional differences between the rat and mouse  
796 melanin-concentrating hormone systems. *PLoS One* **5**, e15471.
- 797 Dilsiz P, Aklan I, Sayar Atasoy N, Yavuz Y, Filiz G, Koksalar F, Ates T, Oncul M, Coban I,  
798 Ates Oz E, Cebecioglu U, Alp M, Yilmaz B & Atasoy D (2020). MCH Neuron Activity Is  
799 Sufficient for Reward and Reinforces Feeding. *Neuroendocrinology* **110**, 258–270.
- 800 Diniz GB, Battagello DS, Klein MO, Bono BSM, Ferreira JGP, Motta-Teixeira LC, Duarte JCG,  
801 Presse F, Nahon JL, Adamantidis A, Chee MJ, Sita L v. & Bittencourt JC (2020). Ciliary  
802 melanin-concentrating hormone receptor 1 (MCHR1) is widely distributed in the murine  
803 CNS in a sex-independent manner. *J Neurosci Res* **0**, 1–27.
- 804 Dong HW (2008). *The Allen reference atlas: A digital color brain atlas of the C57BL/6J male*  
805 *mouse*. John Wiley & Sons, Hoboken, NJ.
- 806 Ebner K, Muigg P, Singewald G & Singewald N (2008). Substance P in Stress and Anxiety NK-  
807 1 Receptor Antagonism Interacts with Key Brain Areas of the Stress Circuitry. *Ann N Y*  
808 *Acad Sci* **1144**, 61–73.
- 809 Elias CF, Saper CB, Maratos-Flier E, Tritos NA, Lee C, Kelly J, Tatro JB, Huffman GE,  
810 Ollmann MM, Barsh GS, Sakurai T, Yanagisawa M & Elmquist JK (1998). Chemically

- 811 defined projections linking the mediobasal hypothalamus and the lateral hypothalamic area.  
812 *J Comp Neurol* **402**, 442–459.
- 813 Ferreira J, Bittencourt J & Adamantidis A (2017). Melanin-concentrating hormone and sleep.  
814 *Curr Opin Neurobiol* **44**, 152–158.
- 815 Gabriella I, Tseng A, Sanchez KO, Shah H, Stanley BG, Gabriella I, Tseng A, Sanchez KO,  
816 Shah H & Stanley BG (2022). Stimulation of GABA Receptors in the Lateral Septum  
817 Rapidly Elicits Food Intake and Mediates Natural Feeding. *Brain Sci* **12**, 848.
- 818 Gallagher JP & Hasuo H (1989). Bicuculline- and phaclofen-sensitive components of  
819 N-methyl-D-aspartate-induced hyperpolarizations in rat dorsolateral septal nucleus  
820 neurones. *J Physiol* **418**, 367–377.
- 821 Gao X (2009). Electrophysiological effects of MCH on neurons in the hypothalamus. *Peptides*  
822 (NY) **30**, 2025–2030.
- 823 Gavioli EC, Canteras NS & de Lima TCM (1999). Anxiogenic-like effect induced by substance  
824 P injected into the lateral septal nucleus. *Neuroreport* **10**, 3399–3403.
- 825 Gavioli EC, Canteras NS & De Lima TCM (2002). The role of lateral septal NK1 receptors in  
826 mediating anxiogenic effects induced by intracerebroventricular injection of substance P.  
827 *Behav Brain Res* **134**, 411–415.
- 828 Georgescu D, Sears RM, Hommel JD, Barrot M, Bolan CA, Marsh DJ, Bednarek MA, Bibb JA,  
829 Maratos-flier E, Nestler EJ & Dileone RJ (2005). The Hypothalamic Neuropeptide  
830 Melanin-Concentrating Hormone Acts in the Nucleus Accumbens to Modulate Feeding  
831 Behavior and Forced-Swim Performance. *J Neurosci* **25**, 2933–2940.
- 832 Harthoorn L, Sañé A, Nethe M & van Heerikhuize J (2005). Multi-transcriptional profiling of  
833 melanin-concentrating hormone and orexin-containing neurons. *Cell Mol Neurobiol* **25**,  
834 1209–1223.
- 835 Hawes B, Kil E, Green B, O'Neill K, Fried S & Graziano M (2000). The melanin-concentrating  
836 hormone receptor couples to multiple G proteins to activate diverse intracellular signaling  
837 pathways. *Endocrinology* **141**, 4524–4532.
- 838 Heldt SA & Ressler KJ (2007). Forebrain and midbrain distribution of major benzodiazepine-  
839 sensitive GABAA receptor subunits in the adult C57 mouse as assessed with in situ  
840 hybridization. *Neuroscience* **150**, 370–385.
- 841 Hervieu G, Cluderay J, Harrison D, Meakin J, Maycox P, Nasir S & Leslie R (2000). The  
842 distribution of the mRNA and protein products of the melanin-concentrating hormone  
843 (MCH) receptor gene, slc-1, in the central nervous system of the rat. *Eur J Neurosci* **12**,  
844 1194–1216.
- 845 Hill J, Duckworth M, Murdock P, Rennie G, Sabido-David C, Ames RS, Szekeres P, Wilson S,  
846 Bergsma DJ, Gloger IS, Levy DS, Chambers JK & Muir AI (2001). Molecular Cloning and

- 847 Functional Characterization of MCH2, a Novel Human MCH Receptor. *J Biol Chem* **276**,  
848 20125–20129.
- 849 Hörtnagl H, Tasan RO, Wieselthaler A, Kirchmair E, Sieghart W & Sperk G (2013). Patterns of  
850 mRNA and protein expression for 12 GABAA receptor subunits in the mouse brain.  
851 *Neuroscience* **236**, 345–372.
- 852 Jego S, Glasgow SD, Herrera CG, Ekstrand M, Reed SJ, Boyce R, Friedman J, Burdakov D &  
853 Adamantidis AR (2013). Optogenetic identification of a rapid eye movement sleep  
854 modulatory circuit in the hypothalamus. *Nat Neurosci* **16**, 1637–1643.
- 855 Kim T-K & Han P-L (2016). Physical Exercise Counteracts Stress-induced Upregulation of  
856 Melanin-concentrating Hormone in the Brain and Stress-induced Persisting Anxiety-like  
857 Behaviors. *Exp Neurobiol* **25**, 163–173.
- 858 Kokkotou E, Jeon JY, Wang X, Marino FE, Carlson M, Trombly DJ, Maratos-flier E, Jeon JY,  
859 Wang X, Marino FE, Carlson M, Trombly DJ & Mice EM (2005). Mice with MCH ablation  
860 resist diet-induced obesity through strain-specific mechanisms. *Am J Physiol Regul Integr*  
861 *Comp Physiol* **02215**, 117–124.
- 862 Kovacs EG, Szalay F & Halasy K (2005). Fasting-induced changes of neuropeptide  
863 immunoreactivity in the lateral septum of male rats. *Acta Biol Hung* **56**, 185–197.
- 864 Krimer LS, Jakab RL & Goldman-Rakic PS (1997). Quantitative three-dimensional analysis of  
865 the catecholaminergic innervation of identified neurons in the macaque prefrontal cortex. *J*  
866 *Neurosci* **17**, 7450–7461.
- 867 Lambe EK, Krimer LS & Goldman-Rakic PS (2000). Differential postnatal development of  
868 catecholamine and serotonin inputs to identified neurons in prefrontal cortex of rhesus  
869 monkey. *J Neurosci* **20**, 8780–8787.
- 870 Lee V & Maguire J (2014). The impact of tonic GABAA receptor-mediated inhibition on  
871 neuronal excitability varies across brain region and cell type. *Front Neural Circuits* **8**, 1–27.
- 872 Lembo PMC, Grazzini E, Cao J, Hubatsch DA, Pelletier M, Hoffert C, St-Onge S, Pou C,  
873 Labrecque J, Groblewski T, O'Donnell D, Payza K, Ahmad S & Walker P (1999). The  
874 receptor for the orexigenic peptide melanin-concentrating hormone is a G-protein-coupled  
875 receptor. *Nat Cell Biol* **1**, 267–271.
- 876 Lin YF, Angelotti TP, Dudek EM, Browning MD & Macdonald RL (1996a). Enhancement of  
877 recombinant  $\alpha 1\beta 1\gamma 2L$   $\gamma$ -aminobutyric acid(A) receptor whole-cell currents by protein  
878 kinase C is mediated through phosphorylation of both  $\beta 1$  and  $\gamma 2L$  subunits. *Mol Pharmacol*  
879 **50**, 185–195.
- 880 Lin YF, Angelotti TP, Dudek EM, Browning MD & Macdonald RL (1996b). Enhancement of  
881 recombinant  $\alpha 1\beta 1\gamma 2L$   $\gamma$ -aminobutyric acid(A) receptor whole-cell currents by protein  
882 kinase C is mediated through phosphorylation of both  $\beta 1$  and  $\gamma 2L$  subunits. *Mol Pharmacol*  
883 **50**, 185–195.

- 884 Lin YF, Browning MD, Dudek EM & Macdonald RL (1994). Protein kinase C enhances  
885 recombinant bovine  $\alpha 1\beta 1\gamma 2L$  GABAA receptor whole-cell currents expressed in L929  
886 fibroblasts. *Neuron* **13**, 1421–1431.
- 887 Lipo E, Asrat S, Huo W, Sol A, Fraser CS & Isberg RR (2022). 5' Untranslated mRNA Regions  
888 Allow Bypass of Host Cell Translation Inhibition by *Legionella pneumophila*. *Infect Immun*  
889 **90**, e0017922.
- 890 Liu J-J, Tsien RW & Pang ZP (2022). Hypothalamic melanin-concentrating hormone regulates  
891 hippocampus-dorsolateral septum activity. *Nat Neurosci* **25**, 61–71.
- 892 Ludwig D, Tritos N, Mastaitis J, Kulkarni R, Kokkotou E, Elmquist J, Lowell B, Flier J &  
893 Maratos-Flier E (2001). Melanin-concentrating hormone overexpression in transgenic mice  
894 leads to obesity and insulin resistance. *J Clin Invest* **107**, 379–386.
- 895 Mansour A, Fox CA, Burke S, Meng F, Thompson RC, Akil H & Watson SJ (1994). Mu, Delta,  
896 and Kappa Opioid Receptor mRNA Expression in the Rat CNS: An In Situ Hybridization  
897 Study. *J Comp Neurol* **350**, 412–438.
- 898 le Merrer J, Cagniard B & Cazala P (2006). Modulation of anxiety by mu-opioid receptors of the  
899 lateral septal region in mice. *Pharmacol Biochem Behav* **83**, 465–479.
- 900 Mickelsen L, Bolisetty M, Chimileski B, Fujita A, Beltrami E, Costanzo J, Naparstek J, Robson  
901 P & Jackson A (2019). Single-cell transcriptomic analysis of the lateral hypothalamic area  
902 reveals molecularly distinct populations of inhibitory and excitatory neurons. *Nat Neurosci*  
903 **22**, 642–656.
- 904 Mickelsen LE, Kolling FW, IV, Chimileski BR, Fujita A, Norris C, Chen K, Nelson CE &  
905 Jackson AC (2017). Neurochemical Heterogeneity Among Lateral Hypothalamic  
906 Hypocretin/Orexin and Melanin-Concentrating Hormone Neurons Identified Through  
907 Single-Cell Gene Expression Analysis. *eNeuro* **4**, 13–17.
- 908 Mogi K, Funabashi T, Mitsushima D, Hagiwara H & Kimura F (2005). Sex Difference in the  
909 Response of Melanin-Concentrating Hormone Neurons in the Lateral Hypothalamic Area to  
910 Glucose, as Revealed by the Expression of Phosphorylated Cyclic Adenosine 3,5-  
911 Monophosphate Response Element-Binding Protein. *Endocrinology* **146**, 3325–3333.
- 912 Monzon M, de Souza M, Izquierdo L, Izquierdo I, Barros D & de Barioglio S (1999). Melanin-  
913 concentrating hormone (MCH) modifies memory retention in rats. *Peptides (NY)* **20**, 1517–  
914 1519.
- 915 Mu M-D, Geng H-Y, Rong K-L, Peng R-C, Wang S-T, Geng L-T, Qian Z-M, Yung W-H & Ke  
916 Y (2020). A limbic circuitry involved in emotional stress-induced grooming. *Nat Commun*  
917 **11**, 2261.
- 918 Mul JD, la Fleur SE, Toonen PW, Afrasiab-Middelmann A, Binnekade R, Schetters D, Verheij  
919 MMM, Sears RM, Homberg JR, Schoffemeer ANM, Adan RAH, DiLeone RJ, de Vries TJ

- 920 & Cuppen E (2011). Chronic loss of melanin-concentrating hormone affects motivational  
921 aspects of feeding in the rat. *PLoS One* **6**, e19600.
- 922 Mystkowski P, Seeley RJ, Hahn TM, Baskin DG, Havel PJ, Matsumoto AM, Wilkinson CW,  
923 Peacock-Kinzig K, Blake KA & Schwartz MW (2000). Hypothalamic Melanin-  
924 Concentrating Hormone and Estrogen-Induced Weight Loss. *J Neurosci* **20**, 8637–8642.
- 925 Negishi K, Payant MA, Schumacker KS, Wittmann G, Butler RM, Lechan RM, Steinbusch  
926 HWM, Khan AM & Chee MJ (2020). Distributions of hypothalamic neuron populations  
927 coexpressing tyrosine hydroxylase and the vesicular GABA transporter in the mouse. *J*  
928 *Comp Neurol* **528**, 1833–1855.
- 929 Noble E, Hahn J, Konanur V, Hsu T, Page S, Cortella A, Liu C, Song M, Suarez A, Szujewski C,  
930 Rider D, Clarke J, Darvas M, Appleyard S & Kanoski S (2018). Control of Feeding  
931 Behavior by Cerebral Ventricular Volume Transmission of Melanin-Concentrating  
932 Hormone. *Cell Metab* **28**, 55-68.e7.
- 933 Noguchi T, Makino S, Shinahara M, Nishiyama M, Hashimoto K & Terada Y (2013). Effects of  
934 gold thioglucose treatment on central corticotrophin-releasing hormone systems in mice. *J*  
935 *Neuroendocrinol* **25**, 340–349.
- 936 Parfitt GM, Nguyen R, Yoon Bang J, Aqrabawi AJ, Tran MM, Seo K, Richards BA & Kim JC  
937 (2017). Bidirectional Control of Anxiety-Related Behaviors in Mice: Role of Inputs Arising  
938 from the Ventral Hippocampus to the Lateral Septum and Medial Prefrontal Cortex.  
939 *Neuropsychopharmacology* **42**, 1715–1728.
- 940 Pissios P, Bradley R & Maratos-Flier E (2006). Expanding the scales: The multiple roles of  
941 MCH in regulating energy balance and other biological functions. *Endocr Rev* **27**, 606–620.
- 942 Pissios P, Trombly DJ, Tzamelis I & Maratos-Flier E (2003). Melanin-concentrating hormone  
943 receptor 1 activates extracellular signal-regulated kinase and synergizes with Gs-coupled  
944 pathways. *Endocrinology* **144**, 3514–3523.
- 945 Poisbeau P, Cheney MC, Browning MD & Mody I (1999). Modulation of synaptic GABA(A)  
946 receptor function by PKA and PKC in adult hippocampal neurons. *J Neurosci* **19**, 674–683.
- 947 Qu D, Ludwig D, Gammeltoft S, Piper M, Pelleymounter M, Cullen M, Mathes W, Przypek R,  
948 Kanarek R & Maratos-Flier E (1996). A role for melanin-concentrating hormone in the  
949 central regulation of feeding behaviour. *Nature* **380**, 243–247.
- 950 Rao Y, Lu M, Ge F, Marsh DJ, Qian S, Wang AH, Picciotto MR & Gao XB (2008). Regulation  
951 of synaptic efficacy in hypocretin/orexin-containing neurons by melanin concentrating  
952 hormone in the lateral hypothalamus. *J Neurosci* **28**, 9101–9110.
- 953 Risold PY & Swanson LW (1997a). Connections of the rat lateral septal complex. *Brain Res*  
954 *Brain Res Rev* **24**, 115–195.
- 955 Risold PY & Swanson LW (1997b). Chemoarchitecture of the rat lateral septal nucleus. *Brain*  
956 *Res Brain Res Rev* **24**, 91–113.



- 957 Rondini TA, de Crudis Rodrigues B, de Oliveira AP, Bittencourt JC & Elias CF (2007).  
958 Melanin-concentrating hormone is expressed in the laterodorsal tegmental nucleus only in  
959 female rats. *Brain Res Bull* **74**, 21–28.
- 960 Rossi M, Choi SJ, O’Shea D, Miyoshi T, Ghatei MA & Bloom SR (1997). Melanin-  
961 concentrating hormone acutely stimulates feeding, but chronic administration has no effect  
962 on body weight. *Endocrinology* **138**, 351–355.
- 963 Ruiz-Viroga V, Urbanavicius J, Torterolo P & Lagos P (2021). In vivo uptake of a fluorescent  
964 conjugate of melanin-concentrating hormone in the rat brain. *J Chem Neuroanat* **114**,  
965 101959.
- 966 Saito Y, Cheng M, Leslie FM & Civelli O (2001). Expression of the melanin-concentrating  
967 hormone (MCH) receptor mRNA in the rat brain. *J Comp Neurol* **435**, 26–40.
- 968 Saito Y, Nothacker HP, Wang Z, Lin SHS, Leslie F & Civelli O (1999). Molecular  
969 characterization of the melanin-concentrating-hormone receptor. *Nature* **400**, 265–269.
- 970 Sears RM, Liu RJ, Narayanan NS, Sharf R, Yeckel MF, Laubach M, Aghajanian GK & DiLeone  
971 RJ (2010). Regulation of nucleus accumbens activity by the hypothalamic neuropeptide  
972 melanin-concentrating hormone. *J Neurosci* **30**, 8263–8273.
- 973 Sheehan TP, Chambers RA & Russell DS (2004). Regulation of affect by the lateral septum □:  
974 implications for neuropsychiatry. *Brain Res Brain Res Rev* **46**, 71–117.
- 975 Shimada M, Tritos NA, Lowell BB, Flier JS & Maratos-Flier E (1998). Mice lacking melanin-  
976 concentrating hormone are hypophagic and lean. *Nature* **396**, 670–674.
- 977 Skofitsch G, Jacobowitz DM & Zamir N (1985). Immunohistochemical Localization of a  
978 Melanin Concentrating Hormone-Like Peptide in the Rat Brain. *Brain Res Bull* **15**, 635–  
979 649.
- 980 Smith D, Davis R, Rorick-Kehn L, Morin M, Witkin J, McKinzie D, Nomikos G & Gehlert D  
981 (2006). Melanin-concentrating hormone-1 receptor modulates neuroendocrine, behavioral,  
982 and corticolimbic neurochemical stress responses in mice. *Neuropsychopharmacology* **31**,  
983 1135–1145.
- 984 Stengel A & Taché Y (2014). CRF and urocortin peptides as modulators of energy balance and  
985 feeding behavior during stress. *Front Neurosci* **8**, 1–10.
- 986 Swanson LW & Cowan WM (1977). An autoradiographic study of the organization of the efferent  
987 connections of the hippocampal formation in the rat. *J Comp Neurol* **172**, 49–84.
- 988 Takase K, Kikuchi K, Tsuneoka Y, Oda S & Kuroda M (2014). Meta-Analysis of Melanin-  
989 Concentrating Hormone Signaling-Deficient Mice on Behavioral and Metabolic  
990 Phenotypes. *PLoS One* **9**, 99961.
- 991 Tan CP et al. (2002). Melanin-concentrating hormone receptor subtypes 1 and 2: Species-  
992 specific gene expression. *Genomics* **79**, 785–792.

- 993 Teixeira PDS, Wasinski F, Lima LB, Frazão R, Bittencourt JC & Donato J (2020). Regulation  
994 and neurochemical identity of melanin-concentrating hormone neurones in the preoptic area  
995 of lactating mice. *J Neuroendocrinol* **32**, e12818.
- 996 Terrill SJ, Subramanian KS, Lan R, Liu CM, Cortella AM, Noble EE & Kanoski SE (2020).  
997 Nucleus accumbens melanin-concentrating hormone signaling promotes feeding in a sex-  
998 specific manner HHS Public Access. *Neuropharmacology* **178**, 108270.
- 999 Valeyev AY, Hackman JC, Holohean AM, Wood PM, Katz JL & Davidoff RA (1999). GABA-  
1000 induced Cl<sup>-</sup> current in cultured embryonic human dorsal root ganglion neurons. *J*  
1001 *Neurophysiol* **82**, 1–9.
- 1002 Van Pett K, Viau V, Bittencourt J, Chan R, Li H, Arias C, Prins G, Perrin M, Vale W &  
1003 Sawchenko P (2000). Distribution of mRNAs encoding CRF receptors in brain and pituitary  
1004 of rat and mouse. *J Comp Neurol* **428**, 191–212.
- 1005 Verret L, Goutagny R, Fort P, Cagnon L, Salvert D, Léger L, Boissard R, Salin P, Peyron C &  
1006 Luppé P-H (2003). A role of melanin-concentrating hormone producing neurons in the  
1007 central regulation of paradoxical sleep. *BMC Neurosci* **4**, 19.
- 1008 Wang C & Kotz C (2002). Urocortin in the lateral septal area modulates feeding induced by  
1009 orexin A in the lateral hypothalamus. *Am J Physiol Regul Integr Comp Physiol* **283**, 358–  
1010 367.
- 1011 Wu M, Dumalska I, Morozova E, van den Pol A & Alreja M (2009). Melanin-concentrating  
1012 hormone directly inhibits GnRH neurons and blocks kisspeptin activation, linking energy  
1013 balance to reproduction. *Proc Natl Acad Sci U S A* **106**, 17217–17222.
- 1014 Xu Y, Lu Y, Cassidy R, Mangieri L, Zhu C, Huang X, Jiang Z, Justice N, Xu Y, Arenkiel B &  
1015 Tong Q (2019). Identification of a neurocircuit underlying regulation of feeding by stress-  
1016 related emotional responses. *Nat Commun* **10**, 3446.
- 1017 Zhao C, Eisinger B & Gammie SC (2013). Characterization of GABAergic Neurons in the  
1018 Mouse Lateral Septum: A Double Fluorescence In Situ Hybridization and  
1019 Immunohistochemical Study Using Tyramide Signal Amplification. *PLoS One* **8**, e73750.
- 1020 Zheng H, Patterson LM, Morrison C, Banfield BW, Randall JA, Browning KN, Travagli RA &  
1021 Berthoud HR (2005). Melanin concentrating hormone innervation of caudal brainstem areas  
1022 involved in gastrointestinal functions and energy balance. *Neuroscience* **135**, 611–625.
- 1023
- 1024

1025 **Legends**

1026 **Figure 1. Relative expression of MCH-immunoreactive fibers, *Mchr1* mRNA, and MCHR1**  
1027 **protein throughout the LS.** Representative confocal photomicrographs of MCH-  
1028 immunoreactive (MCH-ir) fibers (arrowheads) amid NeuroTrace-labeled soma (*Ai*) in the dorsal  
1029 (*Aii*) and ventral regions of the LS (*Aiii*). Coronal map of traced MCH-ir fibers in the LS (*Aiv*) at  
1030 a representative *Allen Reference Atlas* level (*ARA*; Dong, 2008). Fiber density was expressed as  
1031 the percent area covered by MCH-ir fibers at each *ARA* level in the rostral LS (LSr), caudal LS  
1032 (LSc), and ventral LS (LSv; *Av*). Representative confocal photomicrographs of *Mchr1* mRNA  
1033 hybridization amid DAPI-labeled nuclei (*Bi*) showing 1–2 “dots” (open arrowhead; not included  
1034 in subsequent analyses) or 3+ dots (white arrowhead) in the dorsal (*Bii*) and ventral regions of  
1035 the LS (*Biii*). Only dots that surrounded a DAPI-labeled nucleus were included in our analyses.  
1036 Coronal map of *Mchr1* hybridization distributed within the LS at a representative *ARA* level  
1037 (*Biv*). Percent of *Mchr1* cells (comprising 3+ dots) at the LSr, LSc, and LSv of each *ARA* level  
1038 was relative to the total number of *Mchr1* cells per brain (*Bv*). Representative confocal  
1039 photomicrographs of MCHR1 immunoreactivity on the primary cilium (arrowhead) of NeuN-  
1040 immunoreactive neurons (*Ci*) in the dorsal (*Cii*) and ventral regions of the LS (*Ciii*). Coronal  
1041 map of MCHR1-expressing cells at a representative *ARA* level (*Civ*). Percent of total MCHR1  
1042 cells in the LSr, LSc, and LSv at each *ARA* level (*Cv*). Only *ARA* levels captured by our dataset  
1043 were included. Scale bar: 200  $\mu\text{m}$  (*Ai*, *Bi*, *Ci*), 25  $\mu\text{m}$  (*Aii*, *Aiii*), 10  $\mu\text{m}$  (*Bii*, *Biii*), 20  $\mu\text{m}$  (*Cii*,  
1044 *Ciii*). Two-way mixed-effect model ANOVA with Tukey post-hoc testing: \*\*  $p < 0.01$ , \*\*\*\*  $p$   
1045  $< 0.0001$ . ACB, nucleus accumbens; cc, corpus callosum; CP, caudoputamen; LSc, lateral septal  
1046 nucleus, caudal part; LSr, lateral septal nucleus, rostral part; MS, medial septal nucleus; SH,  
1047 septohippocampal nucleus; VL, lateral ventricle.

1048 **Figure 2. Proximity of MCH-immunoreactive fibers to MCHR1-expressing LS cells.**  
1049 Representative merged-channel confocal photomicrographs from the lateral and ventral LSr  
1050 border (*inset*, dashed outlined area) of *Mchr1* mRNA on DAPI stained nuclei (white arrow) in  
1051 relation to MCH-ir fibers (**A**) in close proximity to *Mchr1*-expressing cells (**B**). Representative  
1052 merged-channel confocal photomicrographs from the lateral and ventral LSr border (*inset*,  
1053 dashed outlined area) of MCHR1-ir cilia on NeuN-ir neurons in relation to MCH-ir fibers (**C**),  
1054 which may be adjacent but relatively distant (asterisk) from MCHR1-ir LS cells. High  
1055 magnification confocal photomicrographs with orthogonal projections in the XY-plane of MCH-  
1056 ir varicosities in **C** that are closely associated but do not make physical contact (**D**, open  
1057 arrowhead) or that form appositions (filled arrowhead) at the NeuN-ir soma (**E**) or associated  
1058 MCHR1-ir cilia (**F**). Appositions were observed when no visible space was discerned between  
1059 the MCH-ir varicosity and NeuN-ir soma or MCHR1-ir cilium in both the XZ- and YZ-plane at  
1060 the same optical section (yellow line). Scale bars: 10  $\mu\text{m}$  (**A–C**); 100  $\mu\text{m}$  (*inset*, **A**, **C**); X, Y, Z  
1061 axis 5  $\mu\text{m}$  each (**B–D**). ACB, nucleus accumbens; cc, corpus callosum; CP, caudoputamen; LSc,  
1062 lateral septal nucleus, caudal part; LSr, lateral septal nucleus, rostral part; LSv, lateral septal  
1063 nucleus, ventral part; MS, medial septal nucleus; VL, lateral ventricle.

1064 **Figure 3. MCH directly hyperpolarized LS cells.** Overlaid maps of MCH-immunoreactive  
1065 (MCH-ir) fibers (blue) with low-*Mchr1* (pink circles; **Ai**), high-*Mchr1* (red circles; **Ai**), and  
1066 MCHR1-ir cells (purple circles; **Aii**) at *Allen Reference Atlas* Level 47 (Dong, 2008). Shape of  
1067 the LS in acute brain slices guided whole-cell patch-clamp recordings (*inset*, **Bi**) from cells near  
1068 the ventrolateral border of the LSr (**Bi**). The position of the biocytin-filled recorded cell (*inset*,  
1069 **Bii**) was verified by post hoc staining (**Bii**). Representative sample trace of MCH-mediated  
1070 hyperpolarization following bath application of 3  $\mu\text{M}$  MCH (**Ci**). Time course of the MCH-

1071 mediated change in RMP ( $\Delta$  RMP; *Cii*) was summarized as the mean  $\Delta$  RMP from each cell  
1072 before MCH application (con), at the peak effect of MCH, and after MCH washout (wash) (*Ciii*).  
1073 Representative sample trace of MCH-induced hyperpolarization in the presence of 500 nM TTX  
1074 (*Di*). Time course of  $\Delta$  RMP (*Dii*) was summarized as the mean  $\Delta$  RMP from each cell before  
1075 MCH application (con), at the peak effect of MCH, and after MCH washout (wash) (*Diii*). Scale  
1076 bar: 200  $\mu$ m (*Bi*, *Bii*); 20  $\mu$ m (*Bi inset*); 50  $\mu$ m (*Bii inset*); 25 mV, 2 min (*Ci*); 4 mV, 2 min (*Di*).  
1077 ACB, nucleus accumbens; ccg, corpus callosum, genu; CP, caudoputamen; LSc, lateral septal  
1078 nucleus, caudal part; LSr, lateral septal nucleus, rostral part; MS, medial septal nucleus; VL,  
1079 lateral ventricle.

1080 **Figure 4. MCHR1-mediated hyperpolarization at LS cells.** Brightfield photomicrograph  
1081 showing the placement of a pipette for puff application during patch-clamp recording (*top*, *Ai*).  
1082 Representative sample trace of the change in resting membrane potential ( $\Delta$  RMP) following a  
1083 10-second puff of ACSF or 3  $\mu$ M MCH (MCH 1) followed by a subsequent MCH puff 3 minutes  
1084 later (MCH 2) (*bottom*, *Ai*). Comparison of  $\Delta$  RMP following a puff of ACSF or 3  $\mu$ M MCH  
1085 over time (*Aii*) or immediately after the puff application (*Aiii*). Comparison of  $\Delta$  RMP elicited in  
1086 the presence or absence of the MCHR1 antagonist TC-MCH 7c (10  $\mu$ M) by a 10-second puff of  
1087 MCH (*Bi*), 5-minute bath application of MCH over time (*Bii*), or immediately after MCH  
1088 application (*Biii*). Scale bar: 20  $\mu$ m (*top*, *Ai*) 2 mV, 10 s (*bottom*, *Ai*).

1089 **Figure 5. MCH-mediated activation of protein kinase C-dependent GABA<sub>A</sub> receptors.**  
1090 Representative current output from MCH-sensitive cells immediately before (control), during a 3  
1091  $\mu$ M MCH application, and following MCH washout (wash) in response to voltage steps (250 ms)  
1092 applied at  $-10$  mV increments from  $-55$  mV to  $-125$  mV (bottom right panel) (*Ai*). Comparison  
1093 of the current–voltage relationship of net current elicited by 3  $\mu$ M MCH in the absence (red filled

1094 circles) or presence of the GABA<sub>A</sub> receptor antagonist bicuculline (BIC, 30  $\mu$ M; blue filled  
1095 circles) or with a high internal chloride concentration (green open squares) (**Aii**). Comparison of  
1096 the change in resting membrane potential ( $\Delta$  RMP) in the absence or presence of 30  $\mu$ M BIC by  
1097 a 10-second puff application of MCH over time (**Bi**), 5-minute bath application of MCH over  
1098 time (**Bii**), or immediately after MCH application (**Biii**). Comparison of  $\Delta$  RMP in the absence or  
1099 presence of the protein kinase C inhibitor Calphostin C (CalC, 30  $\mu$ M) by a 10-second puff  
1100 application of MCH over time (**Ci**), 5-minute bath application of MCH over time (**Cii**), or  
1101 immediately after MCH application (**Ciii**). Scale bar: 100 pA, 100 ms (**Ai**).

1102 **Figure 6. MCH suppressed spontaneous but not miniature IPSC events at LS cells.**

1103 Representative sample traces of spontaneous IPSC (sIPSC; **A**) and miniature IPSC (mIPSC)  
1104 events recorded in the presence of 500 nM TTX (**E**) were summarized as the change in sIPSC  
1105 (**B**) or mIPSC frequency over time (**F**). The cumulative distribution of sIPSC (**C**) and mIPSC  
1106 interevent intervals (**G**) and amplitudes (**D**, **H**) were sampled immediately before (con), after  
1107 MCH application, or following MCH washout (wash). Percent change in event frequency or  
1108 amplitude was summarized in the *inset* (**C**, **D**, **G**, **H**). Scale: 50 pA, 150 s (**A**, **B**).

1109 **Figure 7. MCH did not regulate glutamatergic events at LS cells.** Representative sample  
1110 traces of spontaneous EPSC (sEPSC; **A**) and miniature EPSC (mEPSC) events recorded in the  
1111 presence of 500 nM TTX (**E**) were summarized as the change in sEPSC (**B**) or mEPSC  
1112 frequency over time (**F**). The cumulative distribution of sEPSC (**C**) and mEPSC interevent  
1113 intervals (**G**) and amplitudes (**D**, **H**) were sampled immediately before (con), after MCH  
1114 application, or following MCH washout (wash). Percent change in frequency or amplitude was  
1115 summarized in the *inset* (**C**, **D**, **G**, **H**). Scale: 10 pA, 150 s (**A**); 50 pA, 150 s (**B**).

1116

1117 **Additional Information**

1118 **Data Availability.** The data from this study are available upon reasonable request.

1119 **Competing Interests.** The authors have no conflicts of interest to declare.

1120 **Author Contributions.** Study conception and design: M.J.C. Acquisition, analysis, and  
1121 interpretation of neuroanatomical datasets: M.A.P, C.D.S, M.J.C. Acquisition, analysis, and  
1122 interpretation of electrophysiological datasets: M.A.P, M.J.C. Initial manuscript draft: M.A.P,  
1123 C.D.S. Manuscript editing: M.A.P, M.J.C. All authors approved the final manuscript version,  
1124 agree to be accountable for all aspects of the work, and agree that all authors that qualify for  
1125 authorship are listed.

1126 **Funding.** This study was supported by Natural Sciences and Engineering Research Council of  
1127 Canada (NSERC) Discovery Grant RGPIN-2017-06272 and Canadian Institutes of Health  
1128 Research Project Grant 452284. M.A.P is supported by the NSERC Postgraduate Doctoral  
1129 Scholarship and the Ontario Graduate Scholarship. C.D.S is supported by the NSERC Canadian  
1130 Graduate Master's Scholarship.

1131 **Acknowledgements** The authors thank Dr. Ryan Chee for technical assistance writing  
1132 MATLAB scripts.

1133 **Supporting Information.** Schematic of neuroanatomical analyses workflow (Supporting Figure  
1134 1). Detailed maps using *Allen Reference Atlas* brain templates showing the spatial distribution of  
1135 MCH-ir fibers (Supporting Figure 2), *Mchr1* mRNA (Supporting Figure 3), and MCHR1 protein  
1136 (Supporting Figure 4) expression rostrocaudally within the LS.

Figure 1

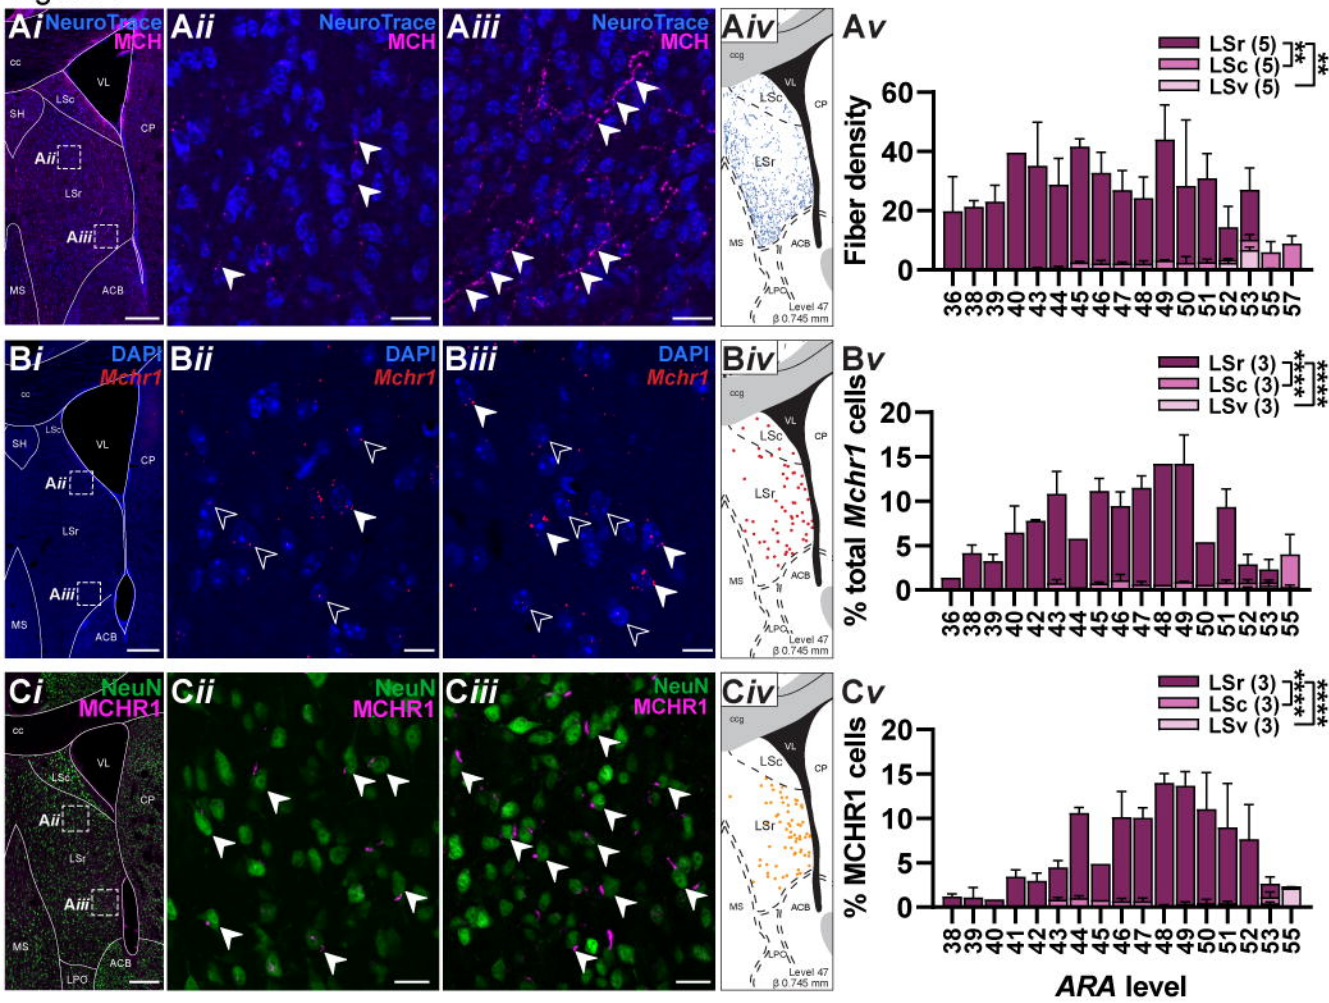



Figure 2

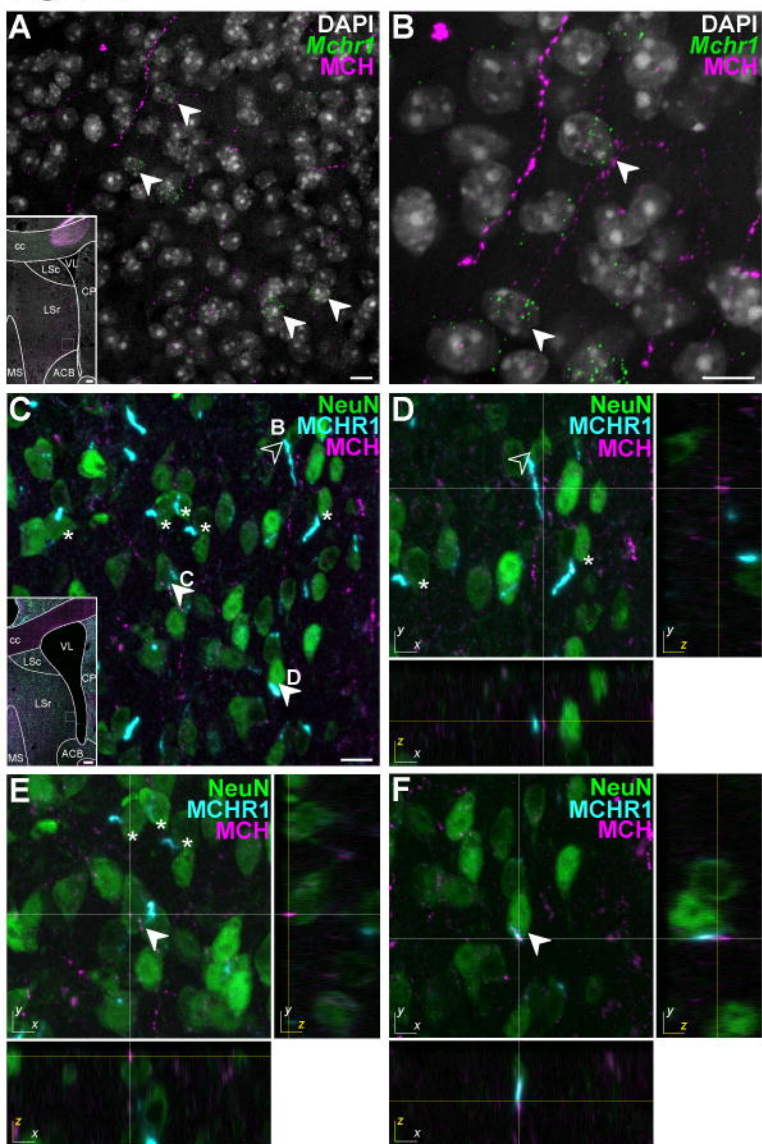

Figure 3

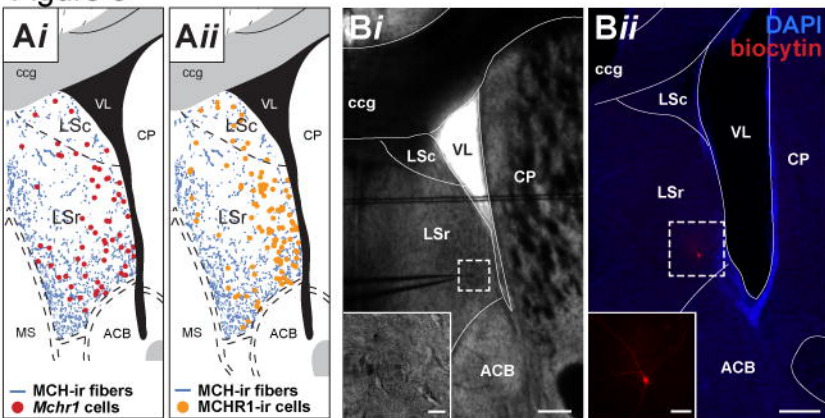

**Ci**

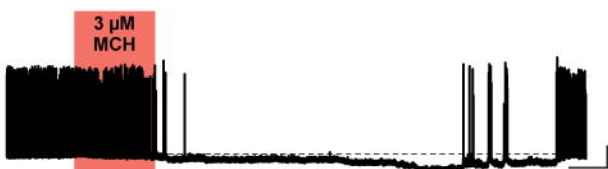

**Cii**

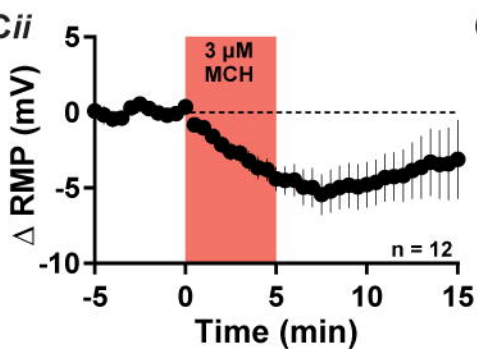

**Ciii**

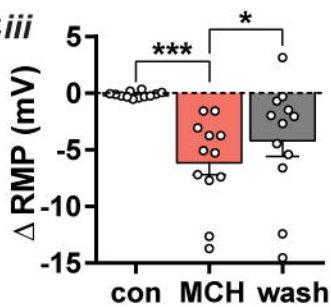

**Di**

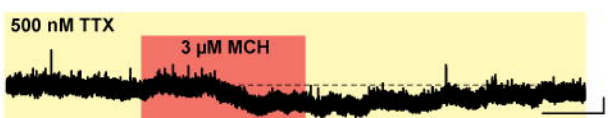

**Dii**

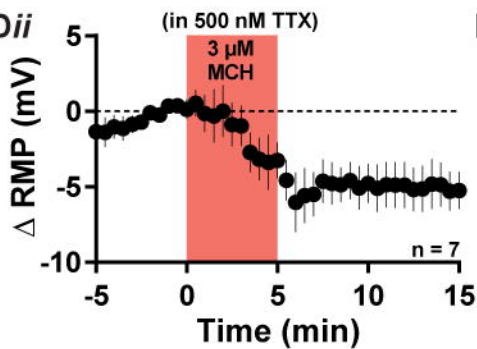

**Diii**

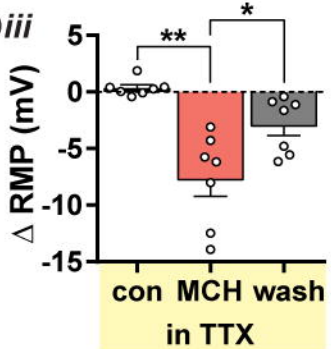

Figure 4

**Ai**

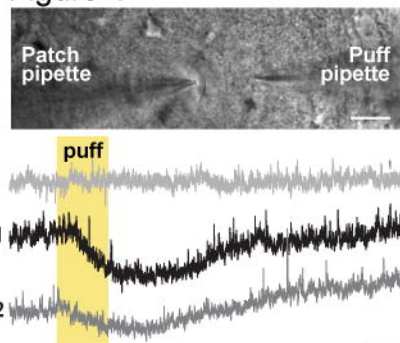

**Aii**

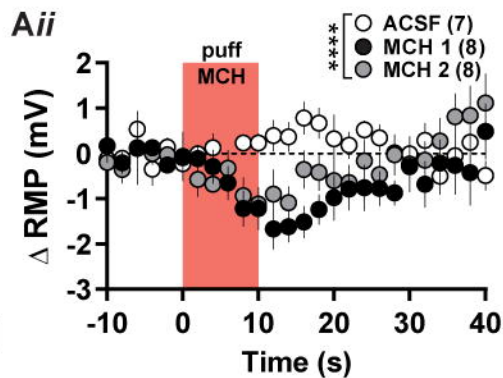

**Aiii**

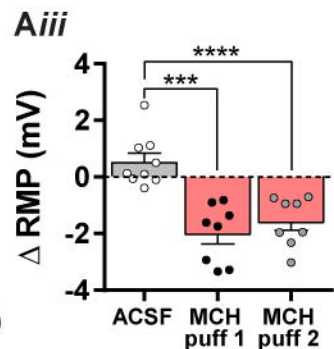

**Bi**

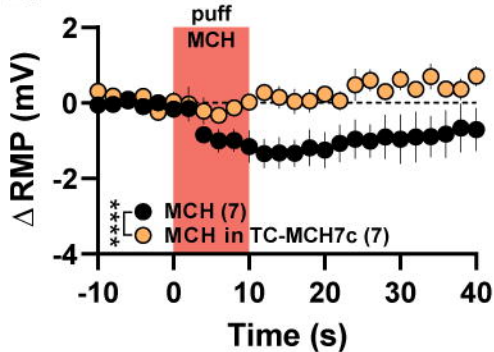

**Bii**

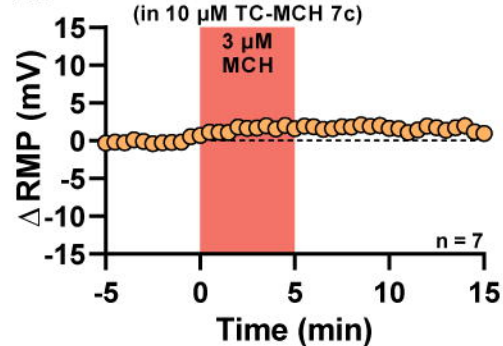

**Biii**

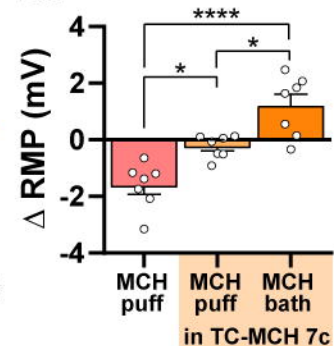

Figure 5

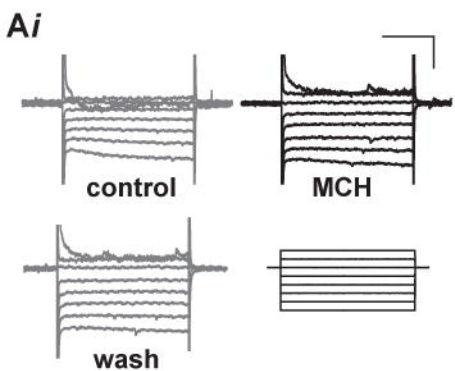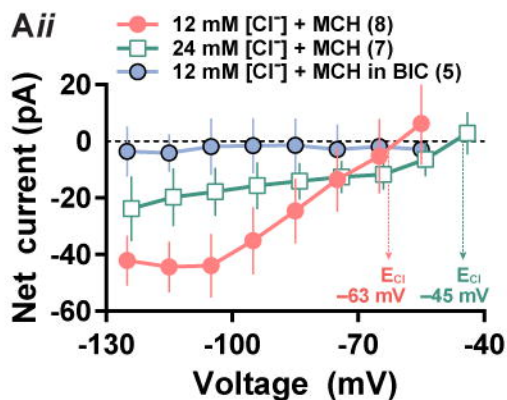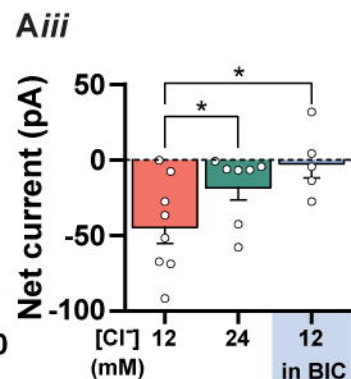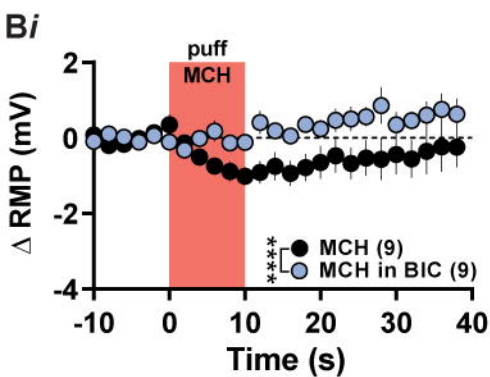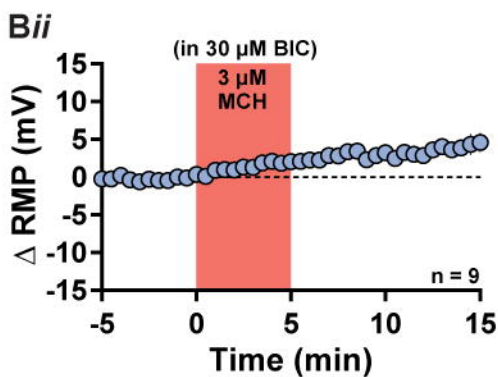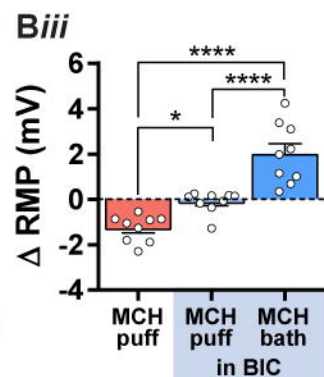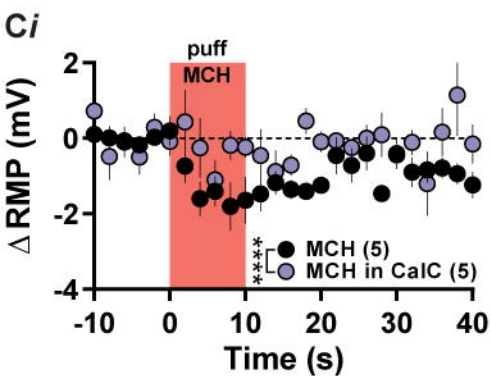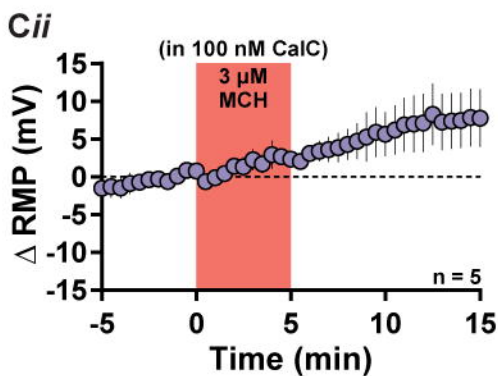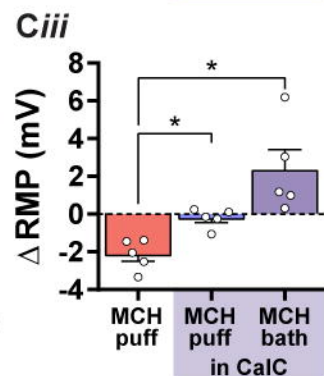

Figure 6

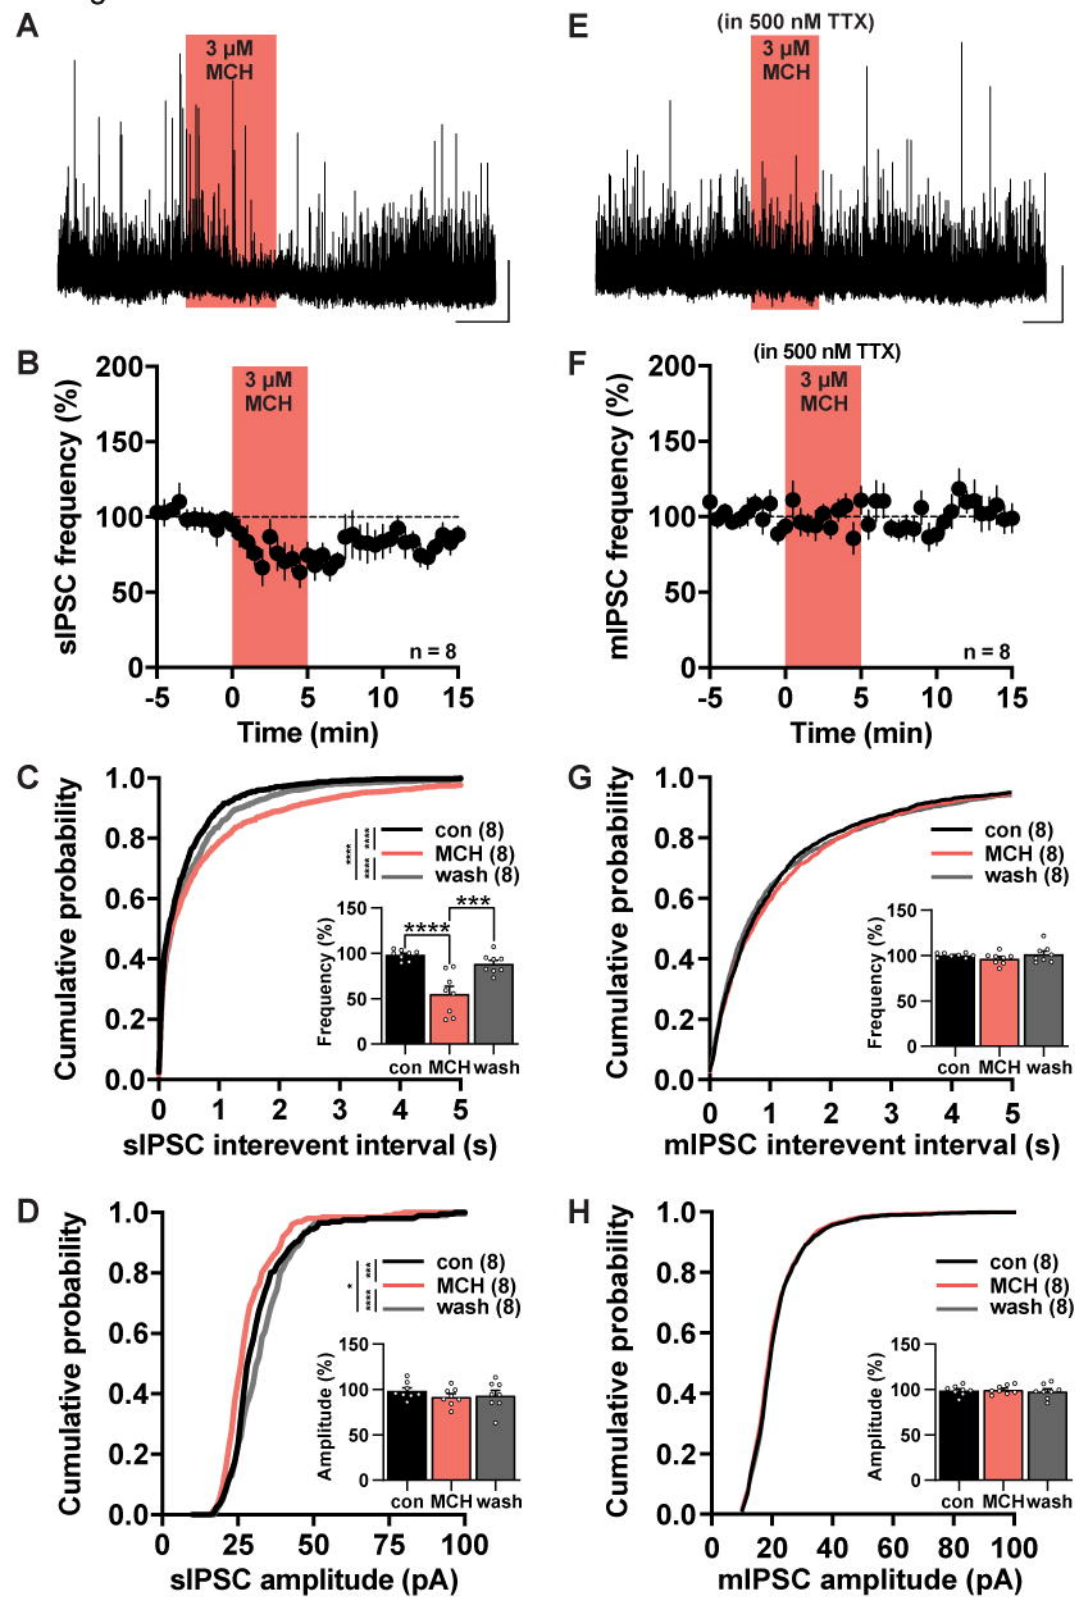

Figure 7

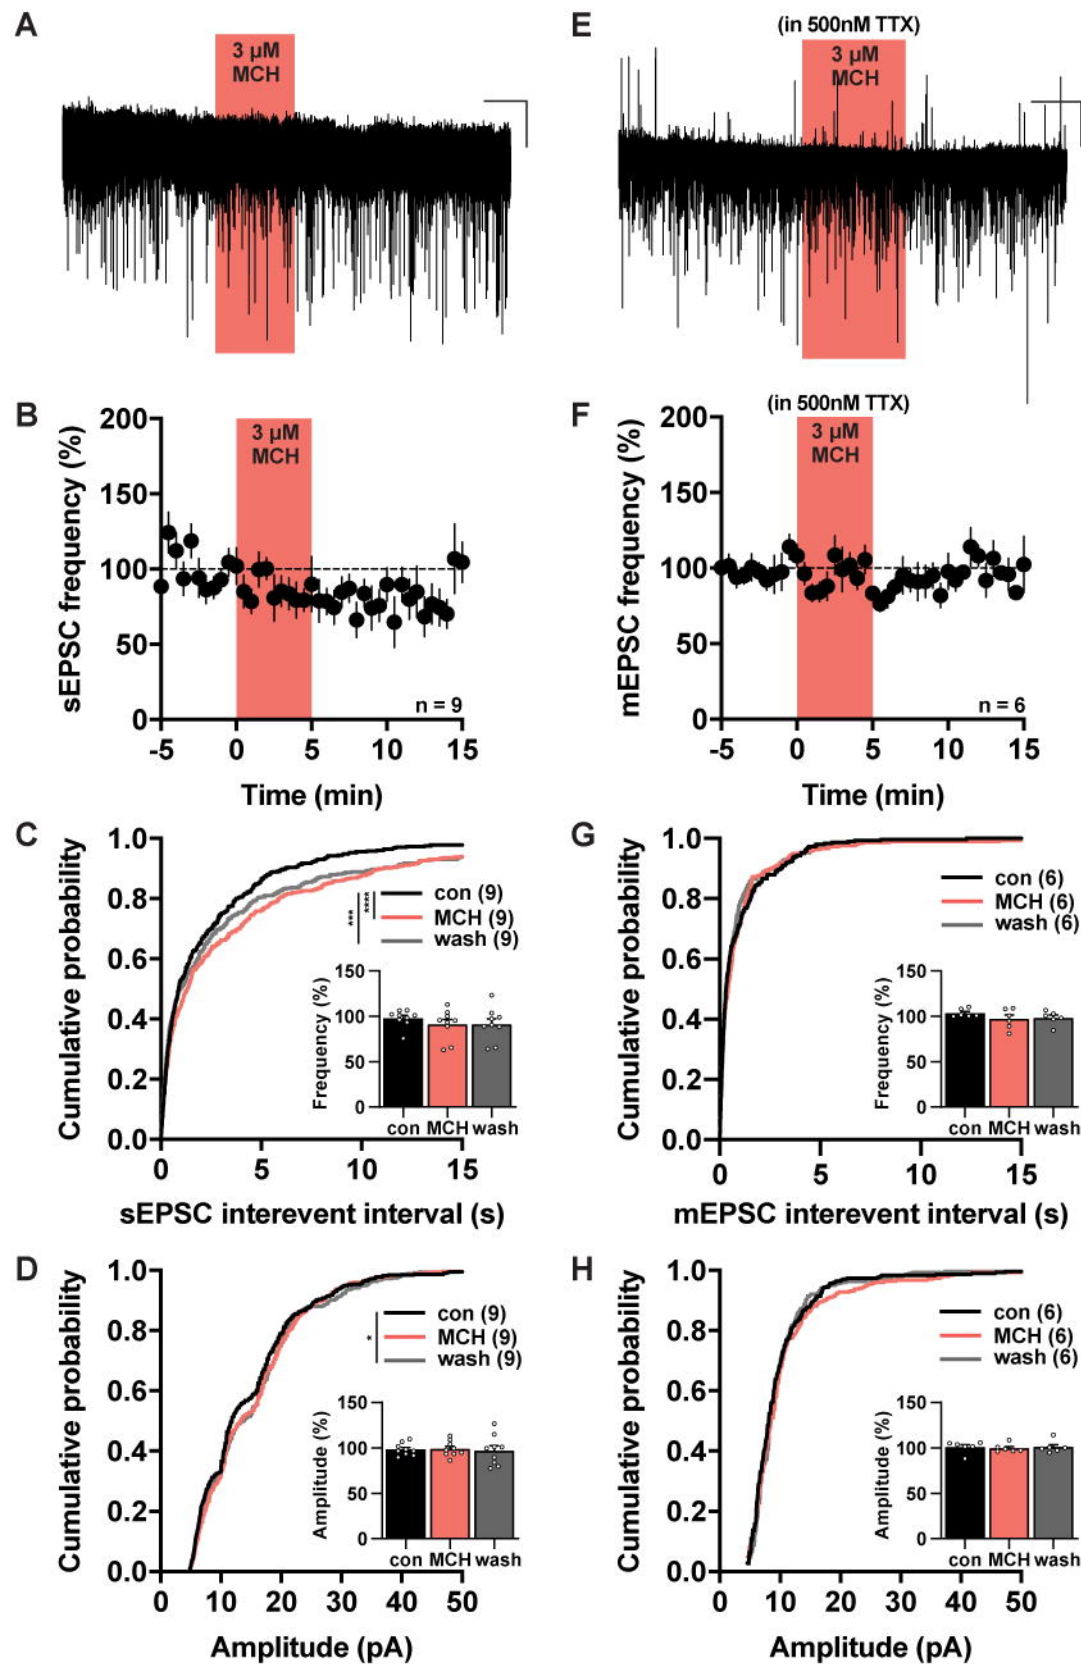

Source: https://www.biorxiv.org/content/10.1101/2023.10.21.562777.full.pdf
